# Supplementary material for: Synthesis of triphenylamines via ligand-free selective ring-opening of benzoxazoles or benzothiazoles under superparamagnetic nanoparticle catalysis
Source: Royal Society of Chemistry journal article supplement (doi:10.1039/c7ra06168d), 2017-01-01
Supplement: c7ra06168d1.pdf [file c7ra06168d1.pdf]

**Synthesis of triphenylamines via ligand-free selective ring-opening of benzoxazoles or  
benzothiazoles under superparamagnetic nanoparticle catalysis**

Oanh T. K. Nguyen, Long T. Nguyen, Nhu K. Truong, Viet D. Nguyen, Anh T. Nguyen, Nhan

T. H. Le, Dung T. Le\*, Nam T. S. Phan\*

Faculty of Chemical Engineering, HCMC University of Technology, VNU-HCM,

268 Ly Thuong Kiet, District 10, Ho Chi Minh City, Viet Nam

\*Email: [ltdung@hcmut.edu.vn](mailto: ltdung@hcmut.edu.vn), [ptsnam@hcmut.edu.vn](mailto: ptsnam@hcmut.edu.vn)

Ph: (+84 8) 38647256 ext. 5681

Fx: (+84 8) 38637504

**Supporting Information**

*Materials and instrumentation*

All reagents and starting materials were obtained commercially from Sigma-Aldrich and Merck, and were used as received without any further purification unless otherwise noted. Nitrogen physisorption measurements were conducted using a Micromeritics 2020 volumetric adsorption analyzer system. Samples were pretreated by heating under vacuum at 150 °C for 3 h. A Netzsch Thermoanalyzer STA 409 was used for thermogravimetric analysis (TGA) with a heating rate of 10 °C/min under a nitrogen atmosphere. X-ray powder diffraction (XRD) patterns were recorded using a Cu K $\alpha$  radiation source on a D8 Advance Bruker powder diffractometer. Scanning electron microscopy studies were conducted on a S4800 Scanning Electron Microscope (SEM).

Transmission electron microscopy studies were performed using a JEOL JEM 1400 Transmission Electron Microscope (TEM) at 80 kV. The  $\text{CuFe}_2\text{O}_4$  sample was dispersed on holey carbon grids for TEM observation. Elemental analysis with atomic absorption spectrophotometry (AAS) was performed on an AA-6800 Shimadzu. Fourier transform infrared (FT-IR) spectra were obtained on a Nicolet 6700 instrument, with samples being dispersed on potassium bromide pellets.

Gas chromatographic (GC) analyses were performed using a Shimadzu GC 2010-Plus equipped with a flame ionization detector (FID) and an SPB-5 column (length = 30 m, inner diameter = 0.25 mm, and film thickness = 0.25  $\mu\text{m}$ ). The temperature program for GC analysis held samples at 100 °C for 1 min; heated them from 100 °C to 280 °C at 40 °C/min; held them at 280 °C for 4.5 min. Inlet and detector temperatures were set constant at 280 °C. The GC yield was calculated using diphenyl ether as the internal standard. GC-MS analyses were analyzed on a Shimadzu GCMS-QP2010Ultra with a ZB-5MS column (length = 30 m, inner diameter = 0.25 mm, and film thickness = 0.25  $\mu\text{m}$ ). The temperature program for GC-MS analysis held samples at 50 °C for 2 min; heated samples from 50 to 280°C at 10 °C/min and held them at 280 °C for 10 min. Inlet temperature was set constant at 280 °C. MS spectra were compared with the spectra gathered in the NIST library. The  $^1\text{H}$  NMR and  $^{13}\text{C}$  NMR were recorded on Bruker AV 500 spectrometers using residual solvent peak as a reference.

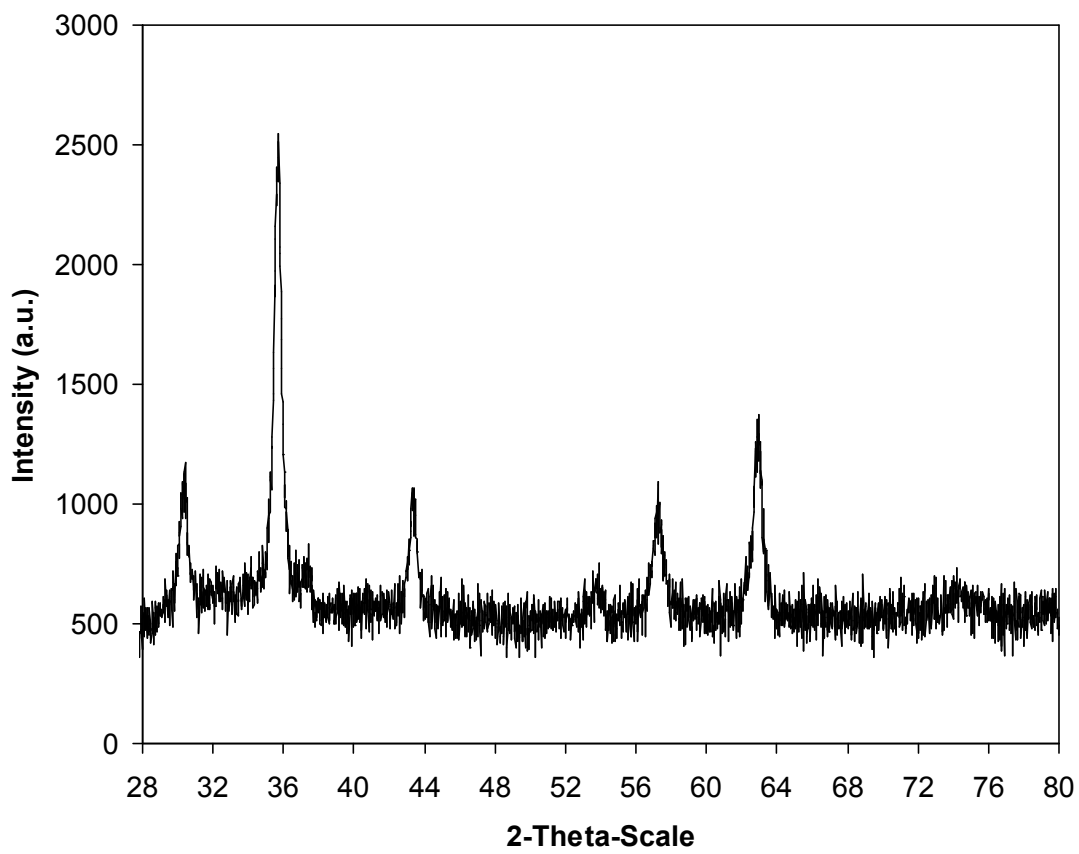

Fig. S1. X-ray powder diffractograms of the  $\text{CuFe}_2\text{O}_4$  catalyst.

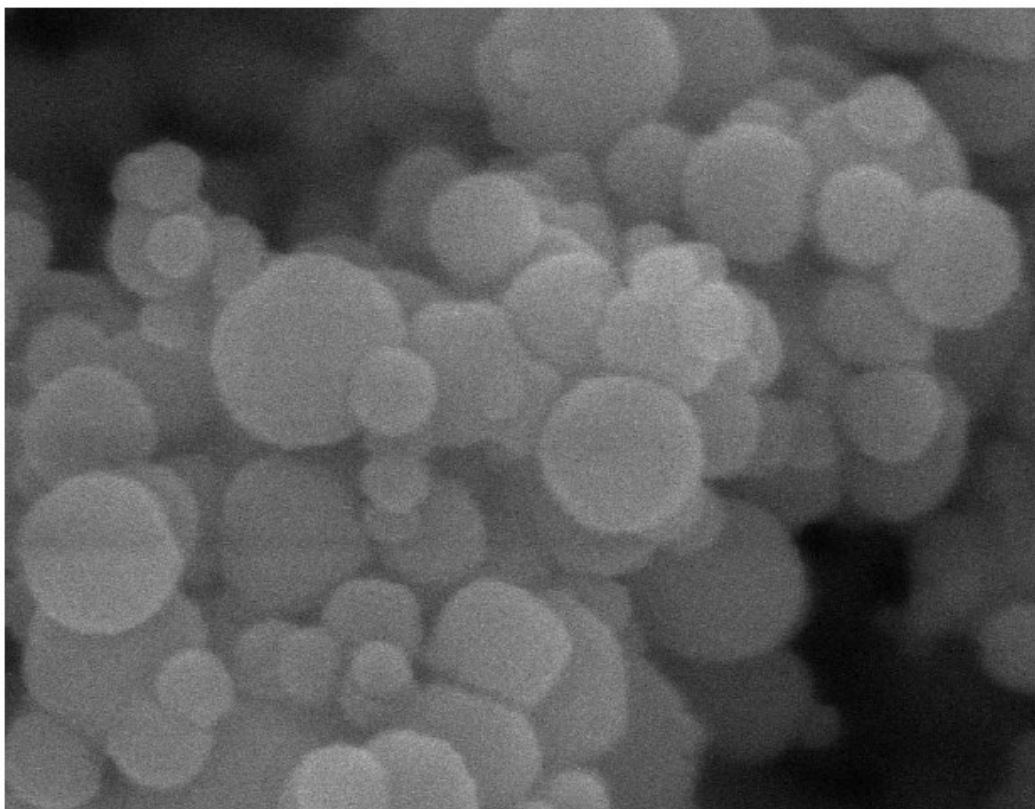

200 nm

Fig. S2. SEM micrograph of the CuFe<sub>2</sub>O<sub>4</sub> catalyst.

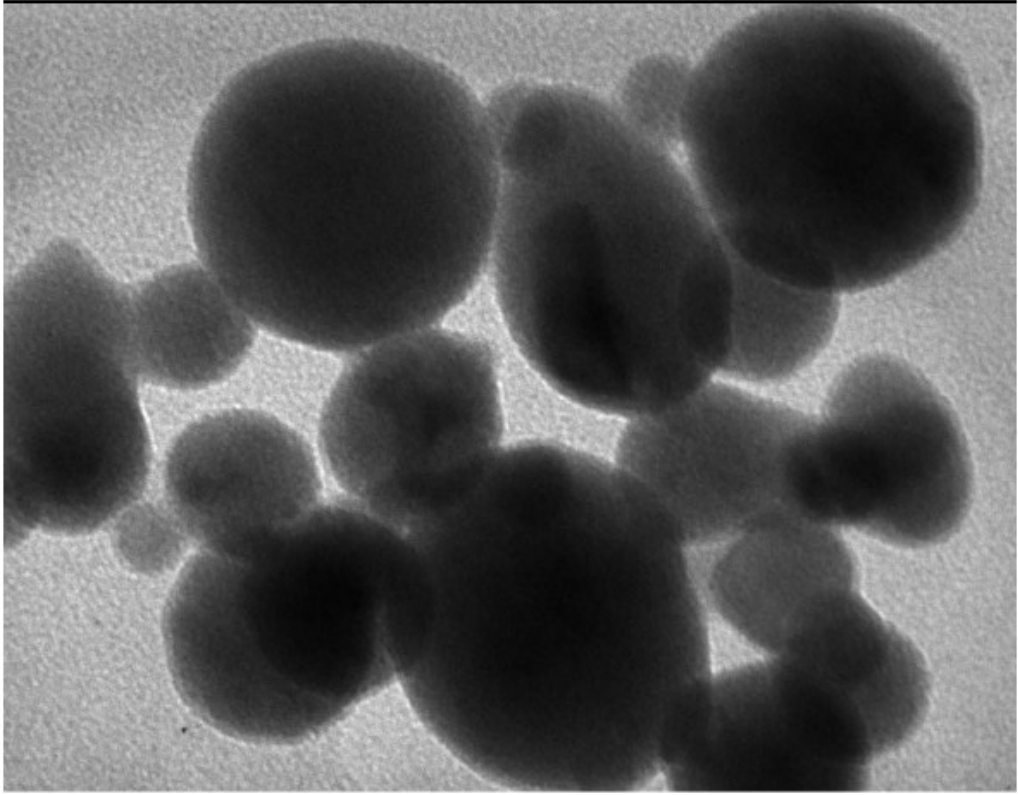

—  
20 nm

Fig. S3. TEM micrograph of the  $\text{CuFe}_2\text{O}_4$  catalyst.

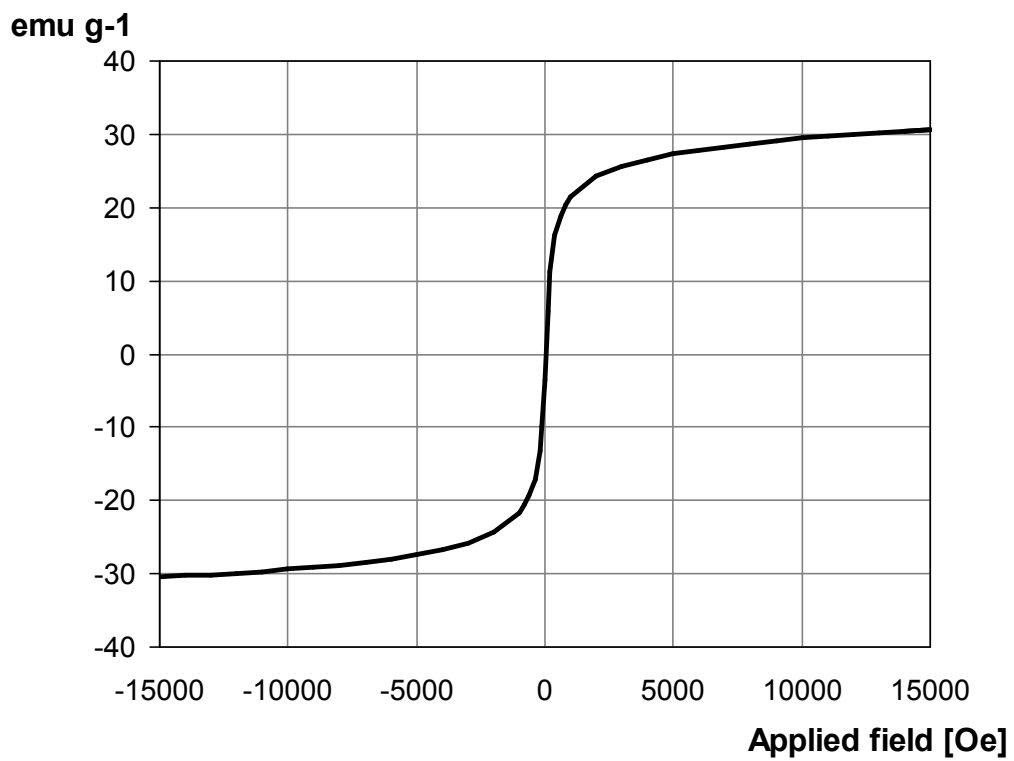

Fig. S4. Magnetization curves for the CuFe<sub>2</sub>O<sub>4</sub> catalyst measured at room temperature.

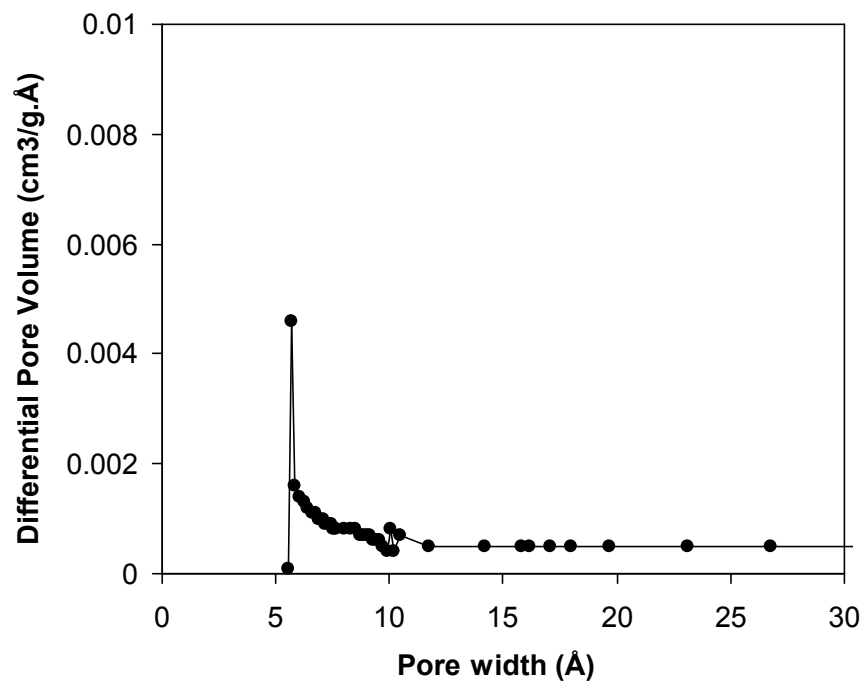

Fig. S5. Pore size distribution of the  $\text{CuFe}_2\text{O}_4$  catalyst.

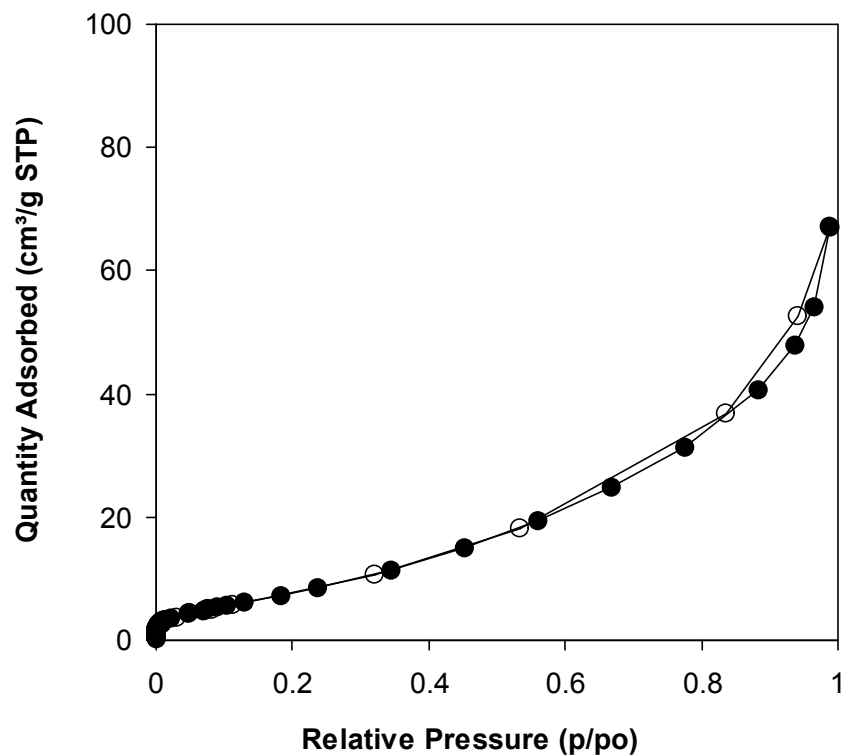

Fig. S6. Nitrogen adsorption/desorption isotherm of the  $\text{CuFe}_2\text{O}_4$  catalyst. Adsorption data are shown as closed circles and desorption data as open circles.



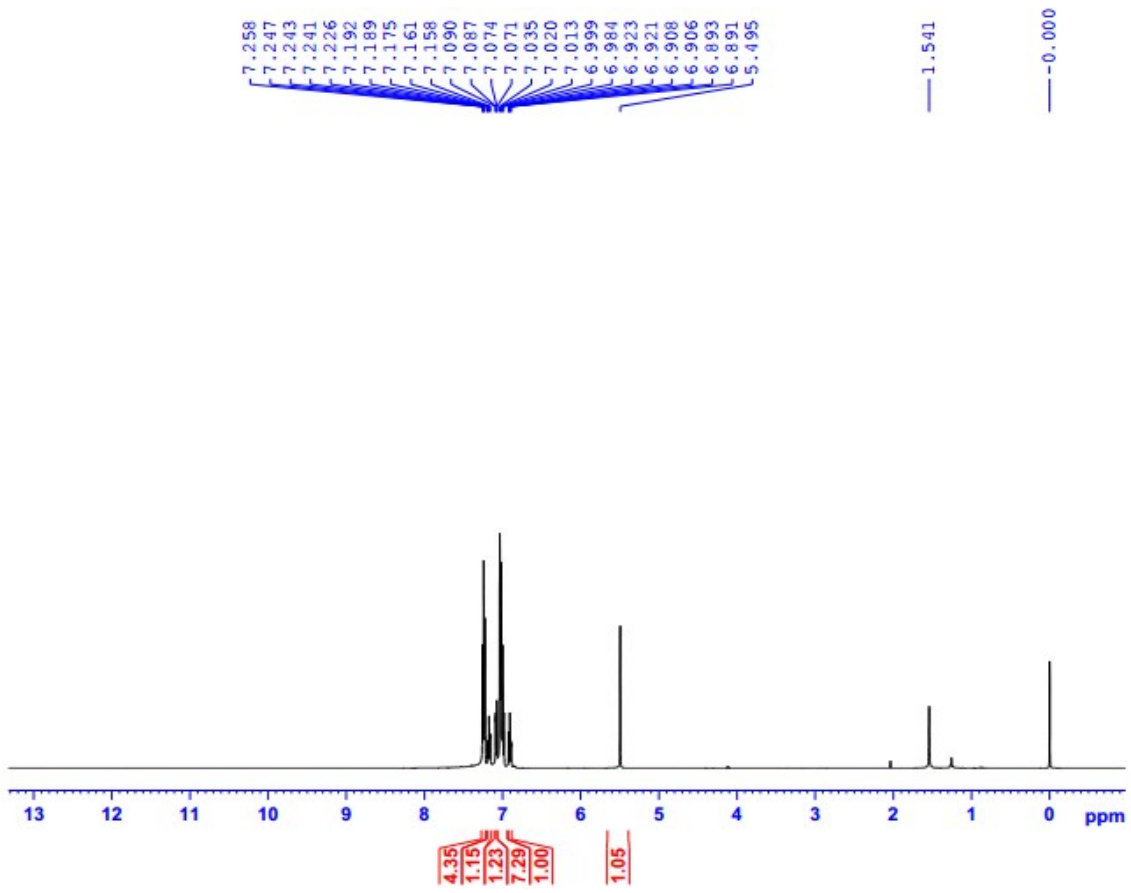

Fig. S7. <sup>1</sup>H-NMR spectra of 2-(diphenylamino)phenol.

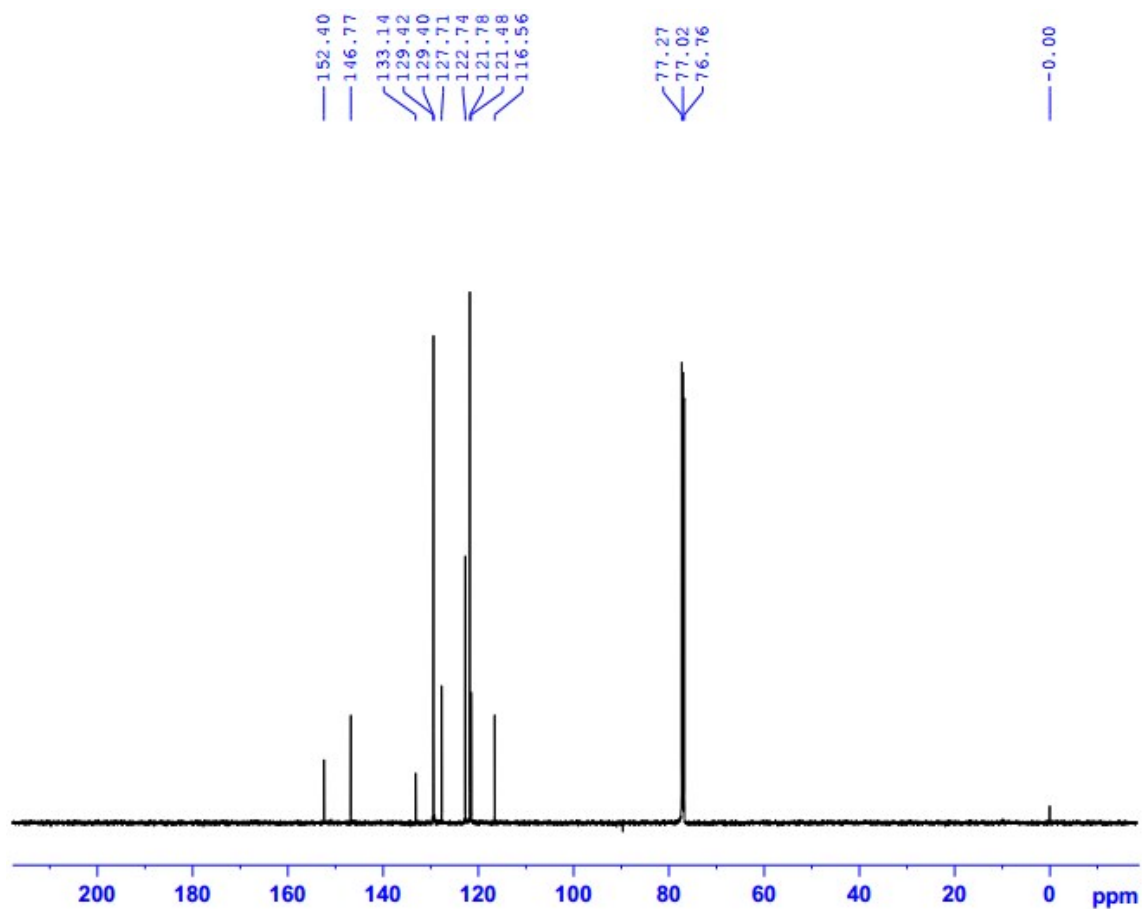

Fig. S8.  $^{13}\text{C}$ -NMR spectra of 2-(diphenylamino)phenol.

**Characterization data for 2-(diphenylamino)phenol.**

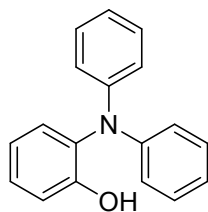

Prepared as shown in the general experimental procedure and purified on silica gel (cyclohexan/ethyl acetate = 15:1): white solid, 92% yield.  $^1\text{H}$ -NMR (500 MHz,  $\text{CDCl}_3$ )  $\delta$  7.26 – 7.23 (m, 4H), 7.19 – 7.16 (m, 1H), 7.09 - 7.07 (dd,  $J$ = 6.5 Hz, 1H), 7.04 – 6.98 (m, 7H), 6.92 -

6.89 (m, 1H), 5.50 (s, 1H);  $^{13}\text{C}$ -NMR (125 MHz,  $\text{CDCl}_3$ )  $\delta$  152.40, 146.77, 133.14, 129.42, 129.40, 127.71, 127.74, 121.78, 121.48, 116.56.

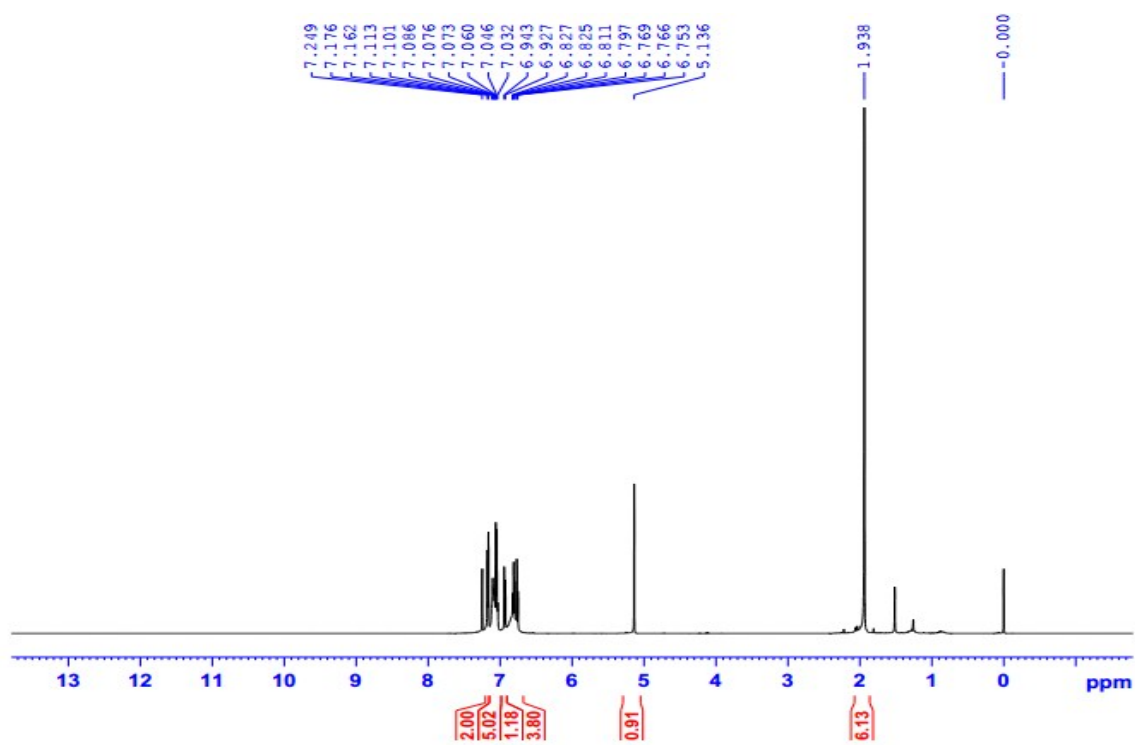

Fig. S9.  $^1\text{H}$ -NMR spectra of 2-(di-o-tolylamino)phenol.

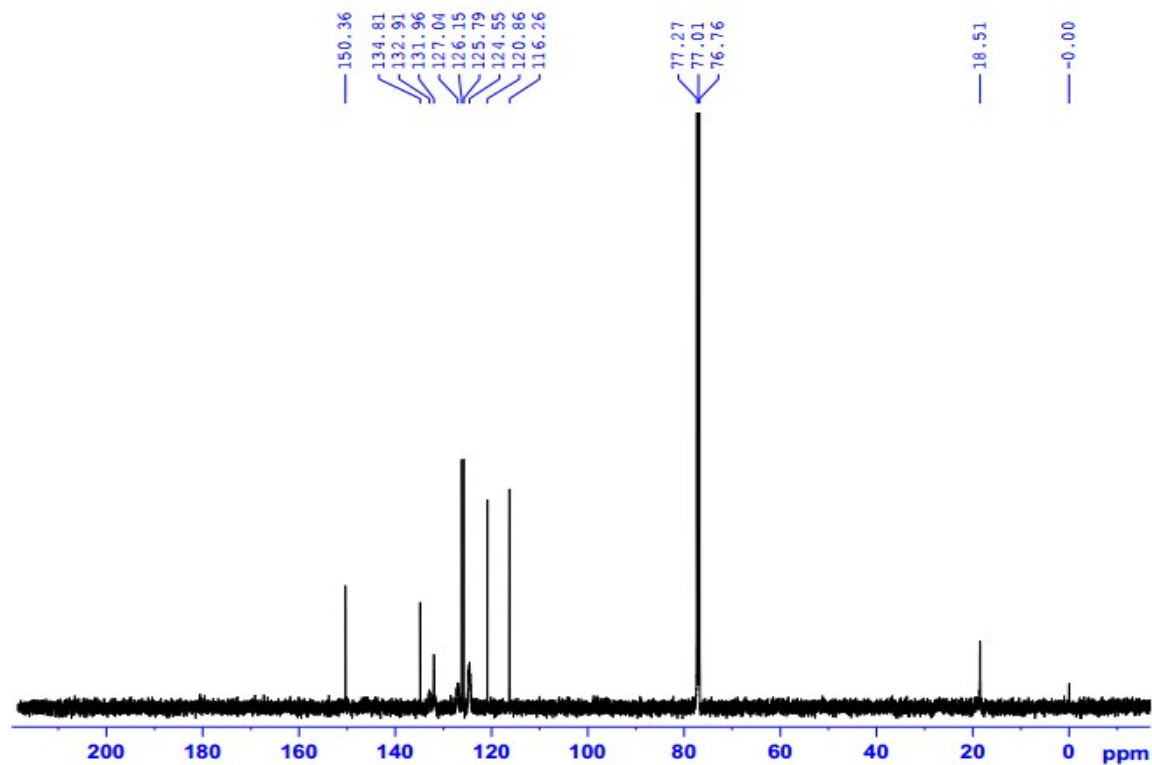

Fig. S10.  $^{13}\text{C}$ -NMR spectra of 2-(di-o-tolylamino)phenol.

#### Characterization data for 2-(di-o-tolylamino)phenol.

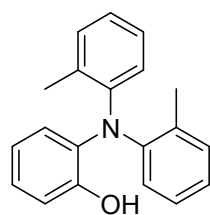

Prepared as shown in the general experimental procedure and purified on silica gel (ethyl acetate/hexan = 1:8): yellow solid, 87% yield.  $^1\text{H}$  NMR (500 MHz,  $\text{CDCl}_3$ )  $\delta$  7.17 (d,  $J$  = 7 Hz, 2H), 7.14 - 7.01 (m, 5H), 6.93 (d,  $J$  = 8 Hz, 1H), 6.84 - 6.74 (m, 4H), 5.14 (s, 1H), 1.94 (s, 6H);  $^{13}\text{C}$  NMR (125 MHz,  $\text{CDCl}_3$ )  $\delta$  150.36, 134.81, 132.91, 131.96, 127.04, 126.15, 125.79, 124.55, 120.86, 116.26, 18.51.

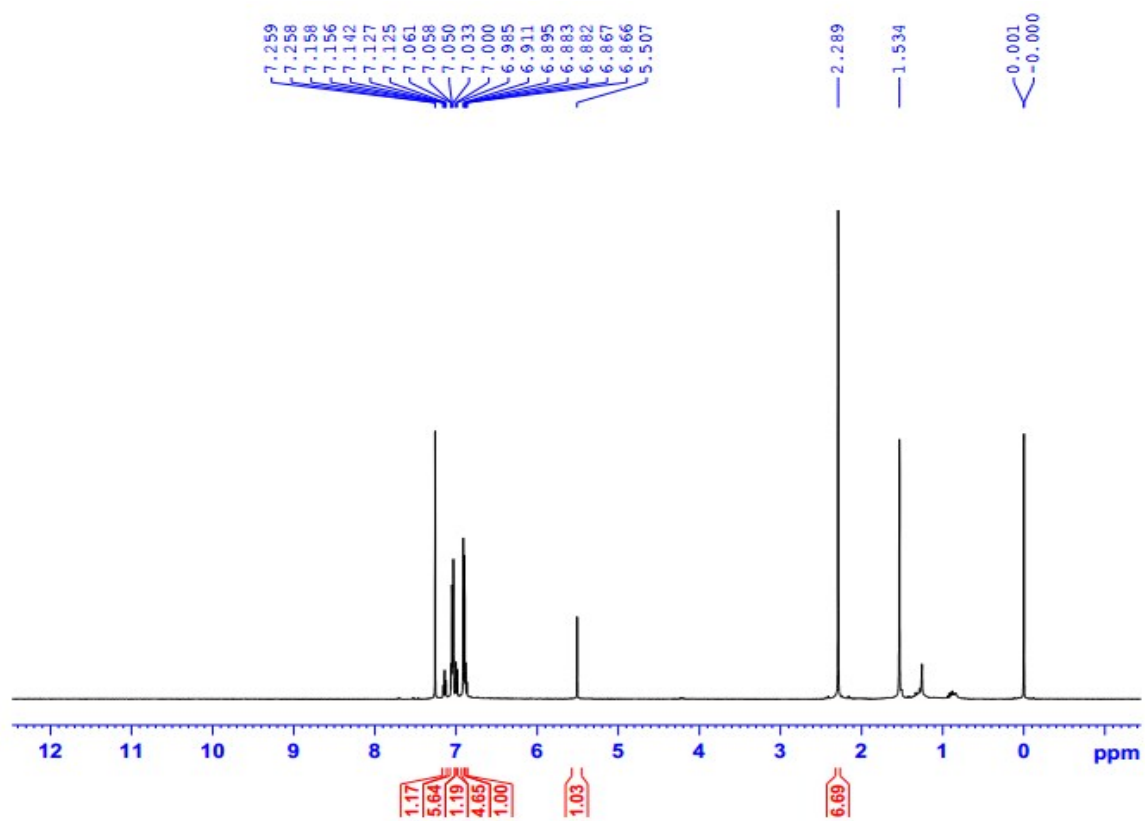

Fig. S11. <sup>1</sup>H-NMR spectra of 2-(di-*p*-tolylamino)phenol.

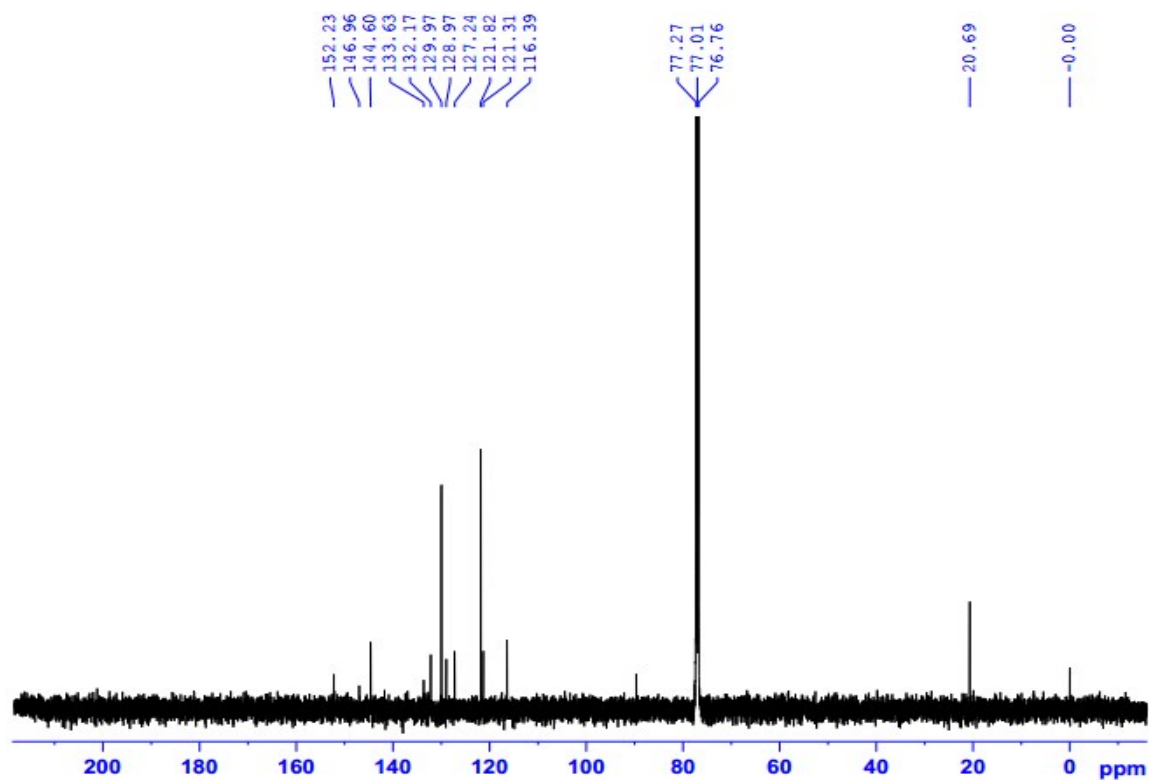

Fig. S12.  $^{13}\text{C}$ -NMR spectra of 2-(di-*p*-tolylamino)phenol.

**Characterization data for 2-(di-*p*-tolylamino)phenol.**

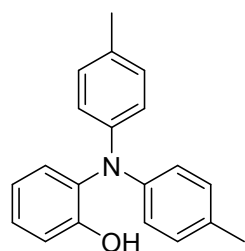

Prepared as shown in the general experimental procedure and purified on silica gel (ethyl acetate/hexan = 1:6): light brown solid, 91% yield.  $^1\text{H}$  NMR (500 MHz,  $\text{CDCl}_3$ )  $\delta$  7.16 - 7.12 (m, 1H), 7.06 - 7.03 (m, 5H), 6.92 (d,  $J= 7.5$  Hz, 1H), 6.90 (d,  $J= 8$  Hz, 4H), 6.88 - 6.86 (d,  $J= 7,5$  Hz, 1H), 5.51 (s, 1H), 2.29 (s, 6H);  $^{13}\text{C}$  NMR (125 MHz,  $\text{CDCl}_3$ )  $\delta$  152.23, 144.96, 133.63, 132.17, 129.97, 128.97, 127.24, 121.82, 121.31, 116.39, 20.69.

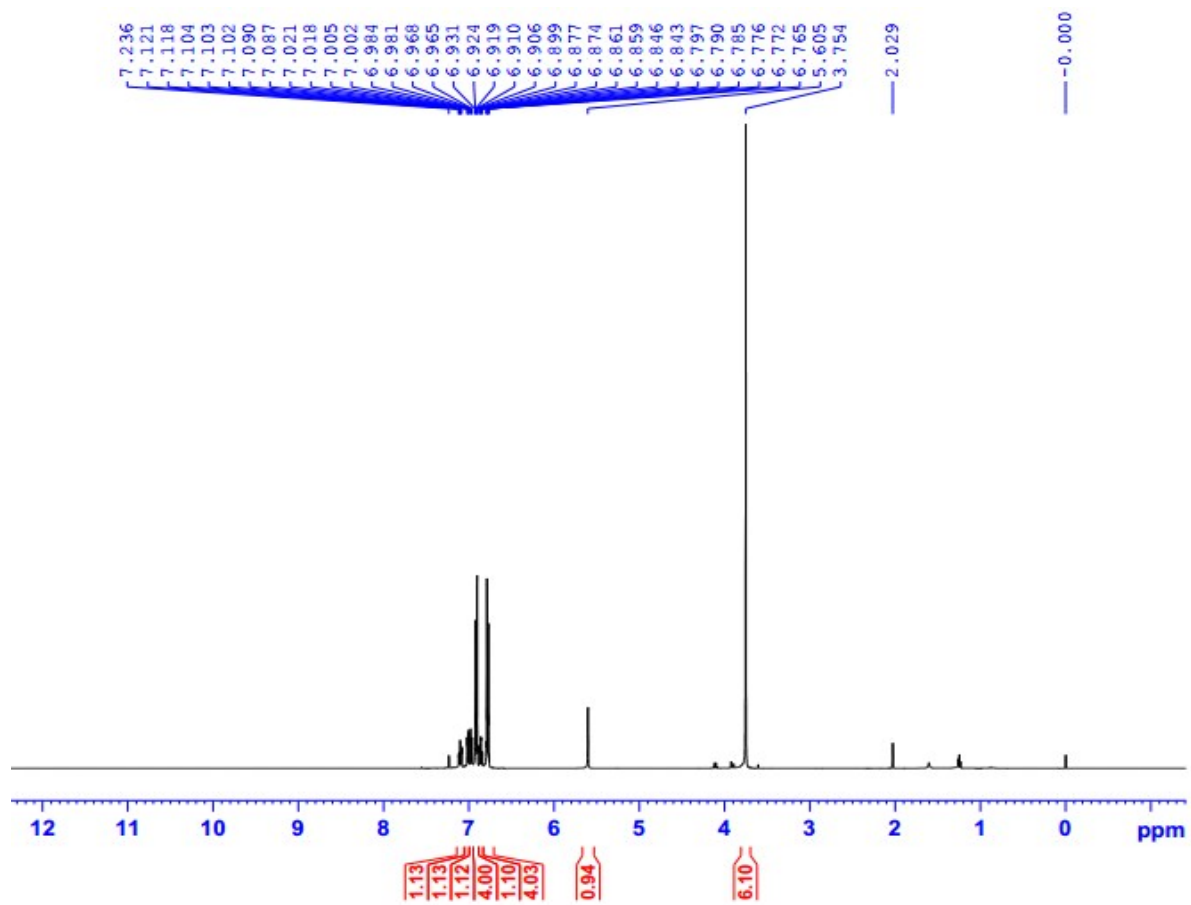

Fig. S13. <sup>1</sup>H-NMR spectra of 2-(bis(4-methoxyphenyl)amino)phenol.

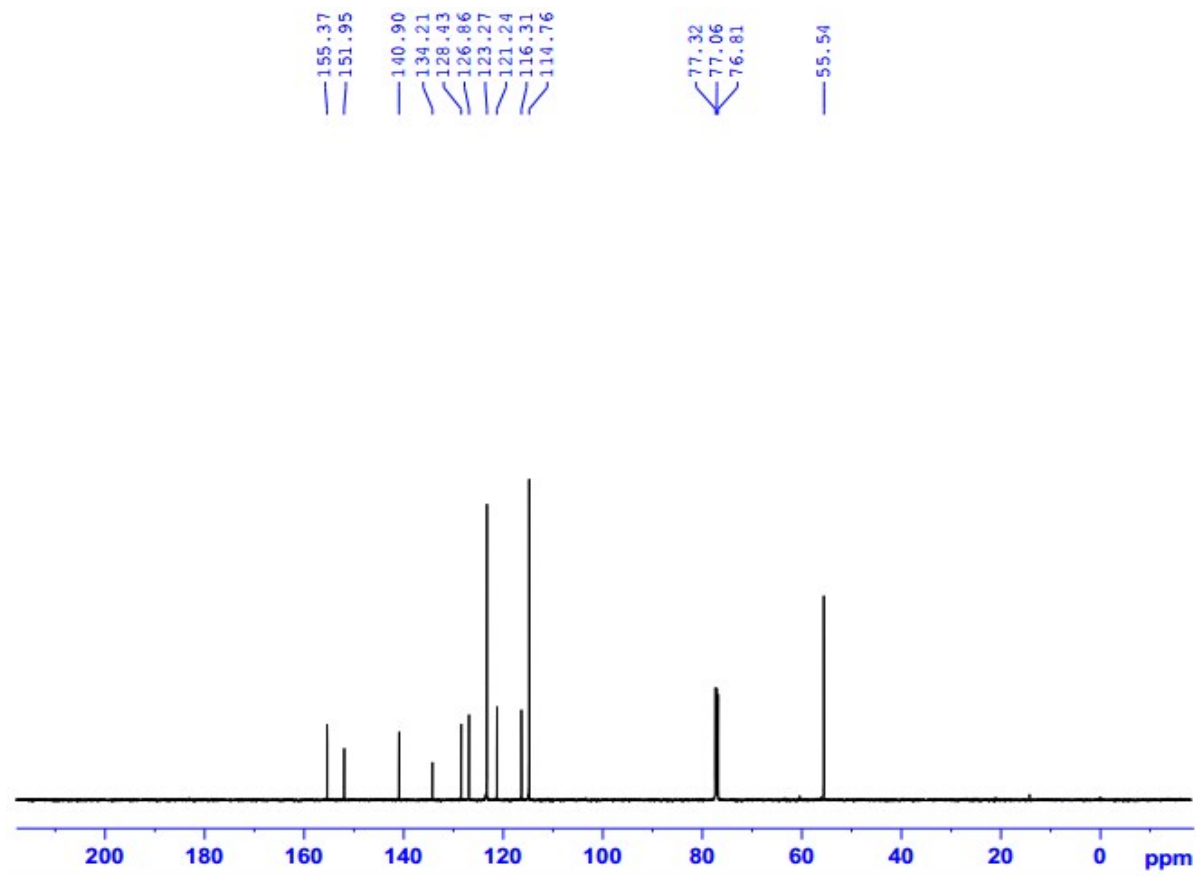

Fig. S14.  $^{13}\text{C}$ -NMR spectra of 2-(bis(4-methoxyphenyl)amino)phenol.

**Characterization data for 2-(bis(4-methoxyphenyl)amino)phenol.**

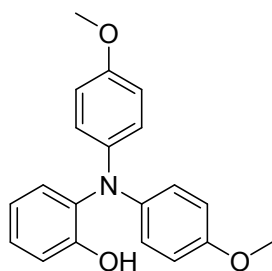

Prepared as shown in the general experimental procedure and purified on silica gel (ethyl acetate/hexan = 1:3): yellow solid, 65% yield.  $^1\text{H}$  NMR (500 MHz,  $\text{CDCl}_3$ )  $\delta$  7.13 - 7.08 (m, 1H), 7.03 - 6.99 (d,  $J$ = 6.5 Hz, 1H), 6.99-6.96 (d,  $J$ = 6 Hz, 1H), 6.94 - 6.89 (m, 4H), 6.88 - 6.84



(m, 1H), 6.81- 6.76 (m, 4H), 5.60 (s, 1H), 3.75 (s, 6H);  $^{13}\text{C}$  NMR (125 MHz,  $\text{CDCl}_3$ )  $\delta$  155.37, 151.95, 140.9, 134.21, 128.43, 126.86, 123.27 121.24, 116.31, 144.76, 55.54.

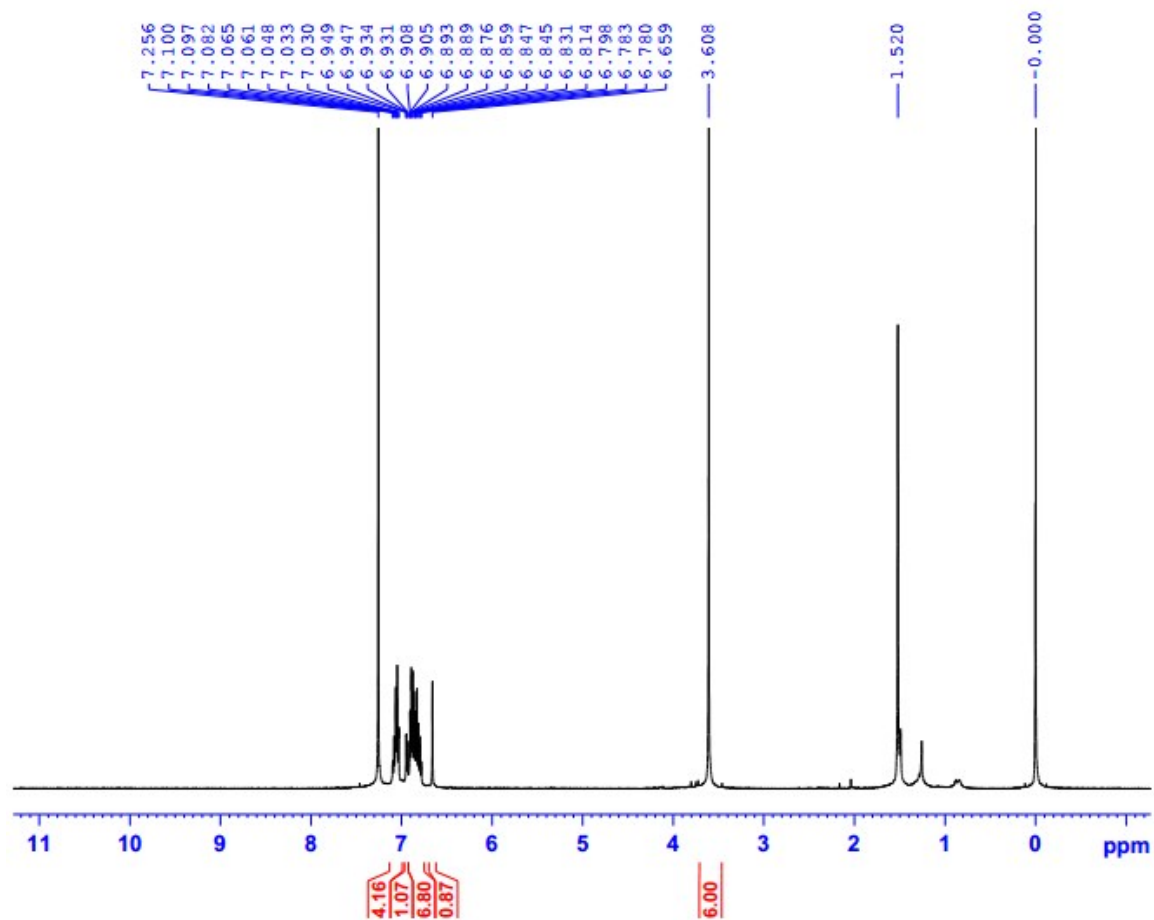

Fig. S15.  $^1\text{H}$ -NMR spectra of 2-(bis(2-methoxyphenyl)amino)phenol.

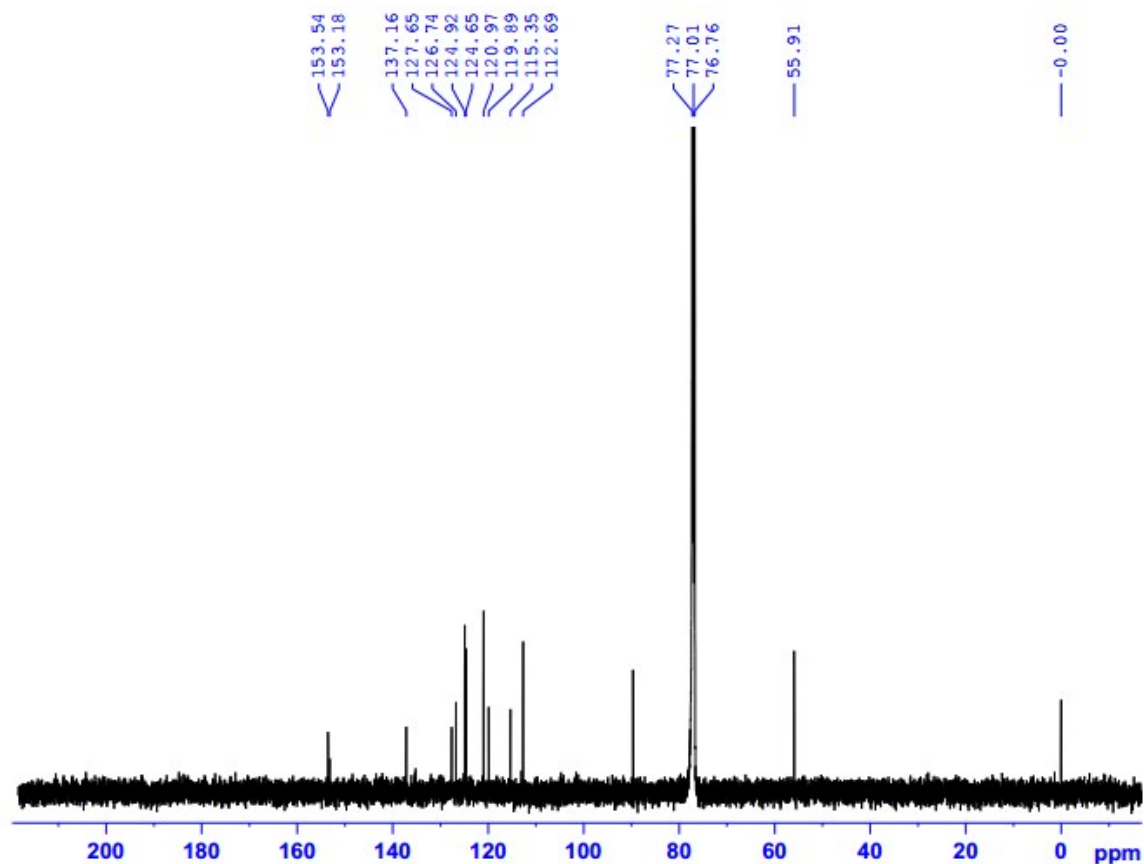

Fig. S16.  $^{13}\text{C}$ -NMR spectra of 2-(bis(2-methoxyphenyl)amino)phenol.

**Characterization data for 2-(bis(2-methoxyphenyl)amino)phenol.**

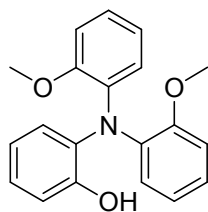

Prepared as shown in the general experimental procedure and purified on silica gel (ethyl acetate/hexan = 1:6): yellow solid, 63% yield.  $^1\text{H}$  NMR (500 MHz,  $\text{CDCl}_3$ )  $\delta$  7.10 - 7.03 (m, 4H), 6.95 - 6.93 (dd,  $J = 6.5$  Hz, 1H), 6.91 - 6.78 (m, 7H), 6.66 (s, 1H);  $^{13}\text{C}$  NMR (125 MHz,  $\text{CDCl}_3$ )  $\delta$  153.54, 153.18, 137.16, 127.65, 126.74, 124.92, 124.65, 120.97, 119.89, 115.35, 112.69, 55.91.

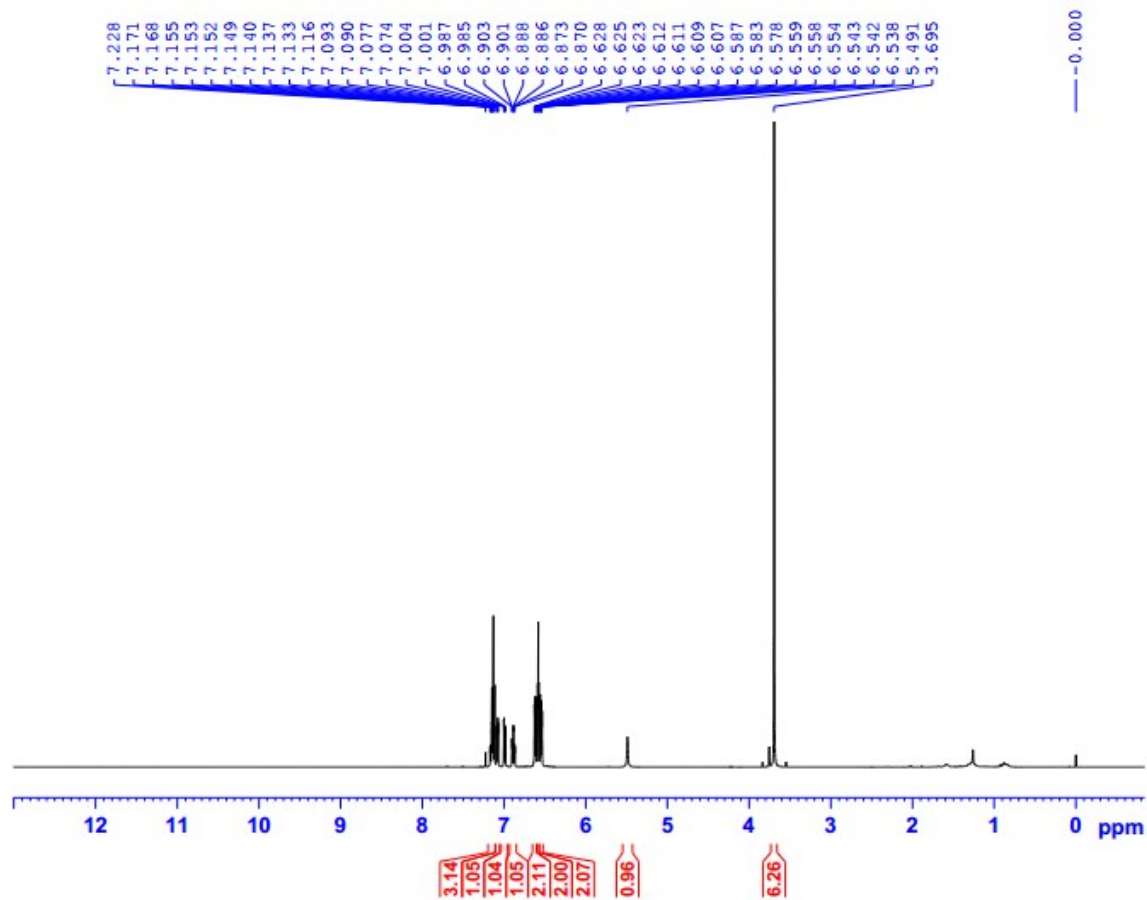

Fig. S17. <sup>1</sup>H-NMR spectra of 2-(bis(3-methoxyphenyl)amino)phenol.

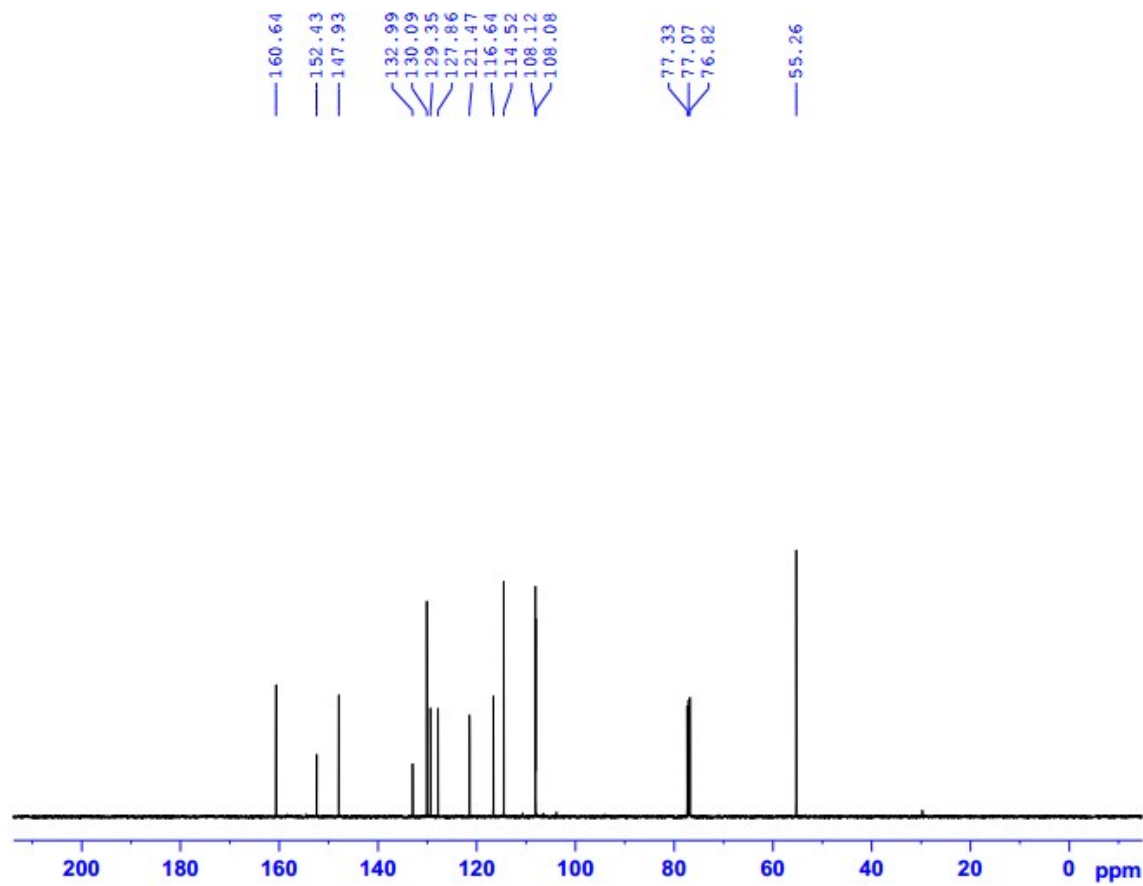

Fig. S18.  $^{13}\text{C}$ -NMR spectra of 2-(bis(3-methoxyphenyl)amino)phenol.

**Characterization data for 2-(bis(3-methoxyphenyl)amino)phenol.**

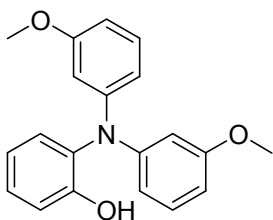

Prepared as shown in the general experimental procedure and purified on silica gel (ethyl acetate/hexan = 1:4): yellow solid, 68% yield.  $^1\text{H}$  NMR (500 MHz,  $\text{CDCl}_3$ )  $\delta$  7.17 - 7.07 (m, 4H), 7.00 - 6.98 (dd,  $J = 7$  Hz, 1H), 6.90 - 6.87 (m, 1H), 6.63 - 6.54 (m, 6H), 5.49 (s, 1H), 3.69 (s,

6H);  $^{13}\text{C}$  NMR (125 MHz,  $\text{CDCl}_3$ )  $\delta$  160.64, 152.43, 147.93, 132.99, 130.09, 129.35, 127.86, 121.47, 116.64, 114.52, 108.12, 108.08, 55.26.

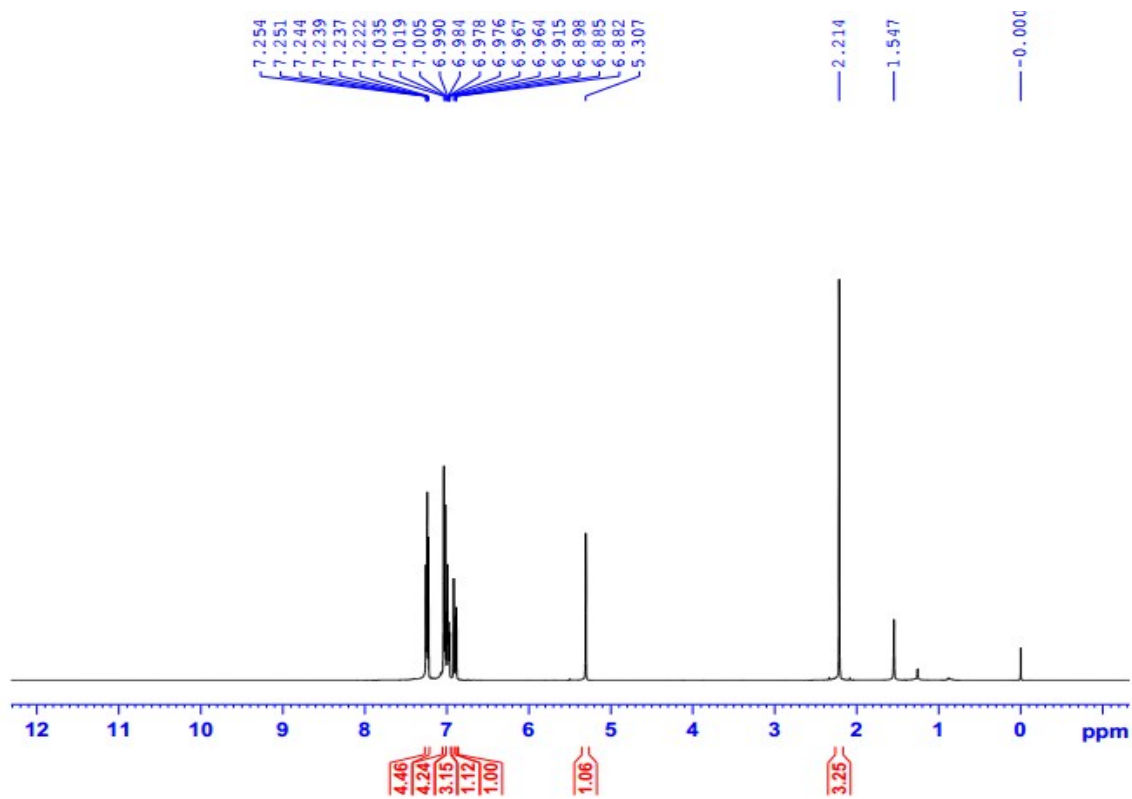

Fig. S19. <sup>1</sup>H-NMR spectra of 2-(diphenylamino)-4-methylphenol.

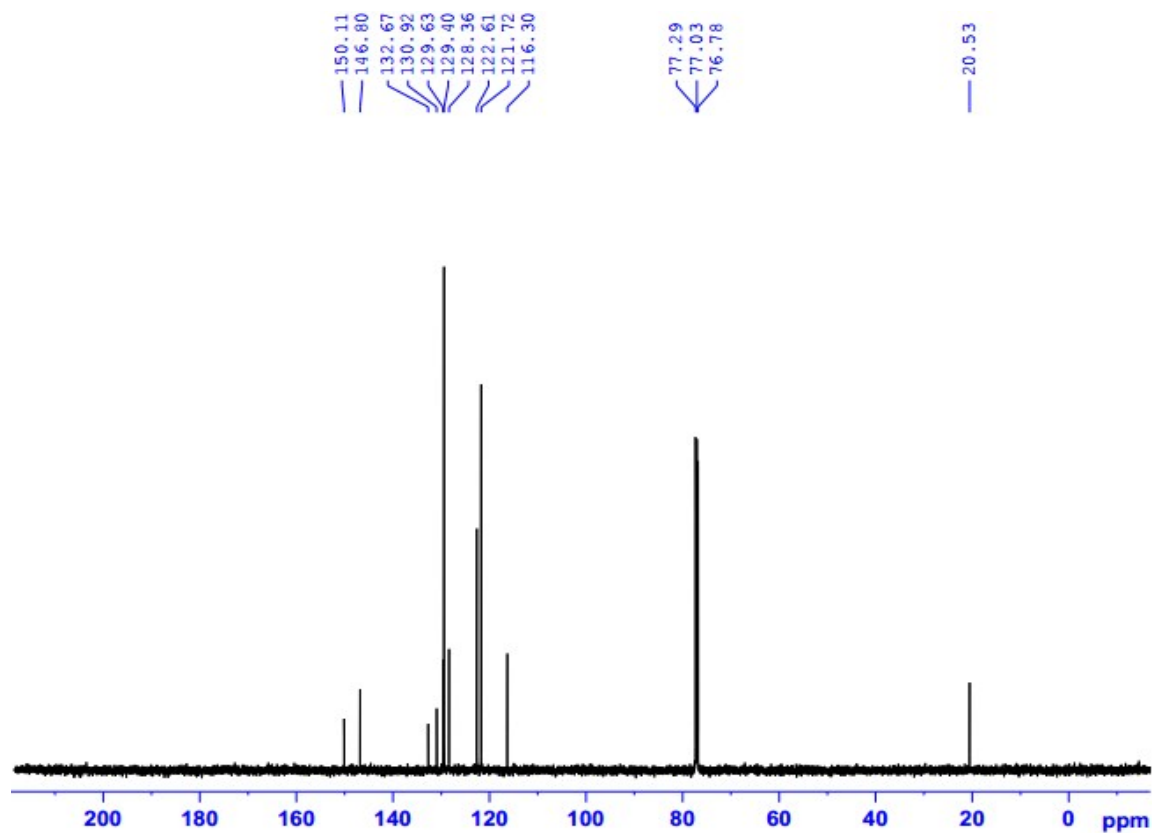

Fig. S20.  $^{13}\text{C}$ -NMR spectra of 2-(diphenylamino)-4-methylphenol.

**Characterization data for 2-(diphenylamino)-4-methylphenol.**

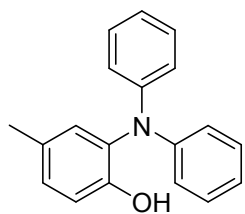

Prepared as shown in the general experimental procedure and purified on silica gel (ethyl acetate/hexan = 1:8): yellow iol, 86% yield.  $^1\text{H}$ -NMR (500 MHz,  $\text{CDCl}_3$ )  $\delta$  7.25 - 7.22 (m, 4H), 7.03 (d,  $J$  = 7.5 Hz, 4H), 7.00 - 6.96 (m, 3H), 6.96 (d,  $J$  = 8.5 Hz, 1H), 6.88 (s, 1H), 5.31 (s, 1H), 2.21 (s, 3H);  $^{13}\text{C}$ -NMR (125 MHz,  $\text{CDCl}_3$ )  $\delta$  150.11, 146.80, 132.67, 130.92, 129.63, 129.40, 128.36, 122.61, 121.72, 116.30.

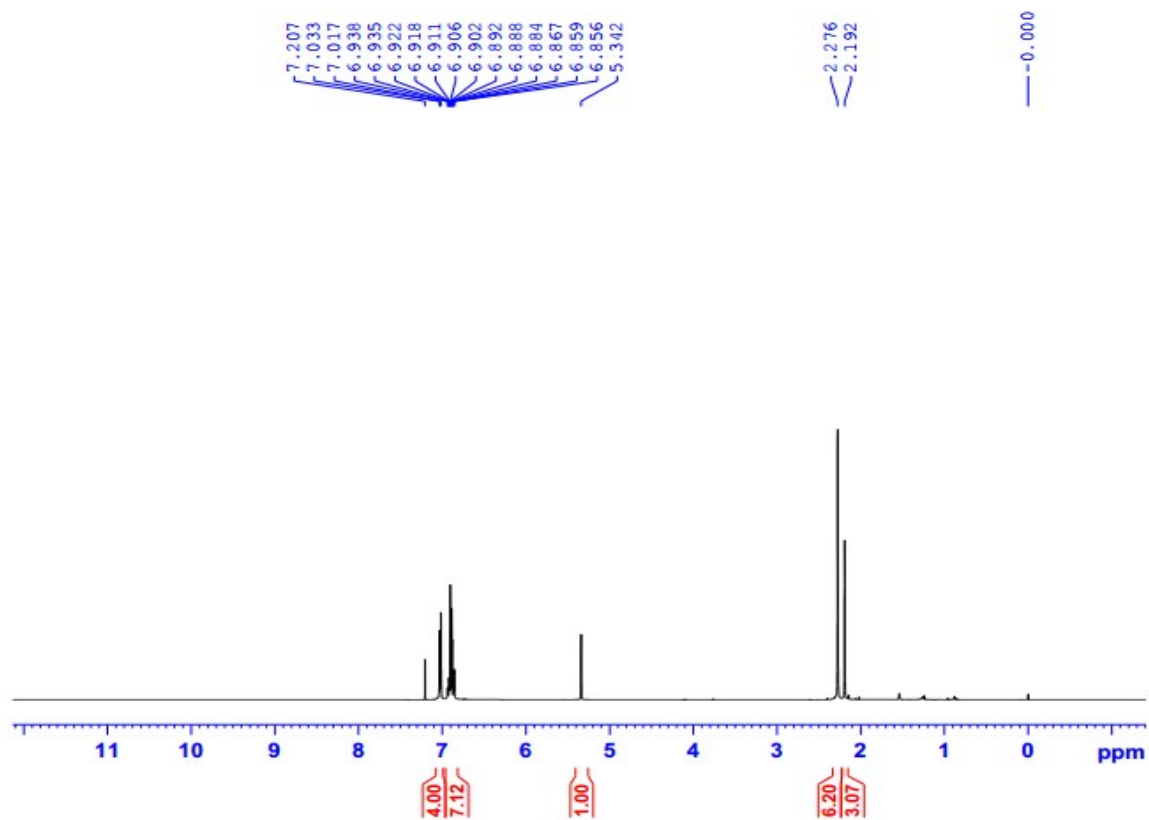

Fig. S21. <sup>1</sup>H-NMR spectra of 2-(di-*p*-tolylamino)-4-methylphenol.



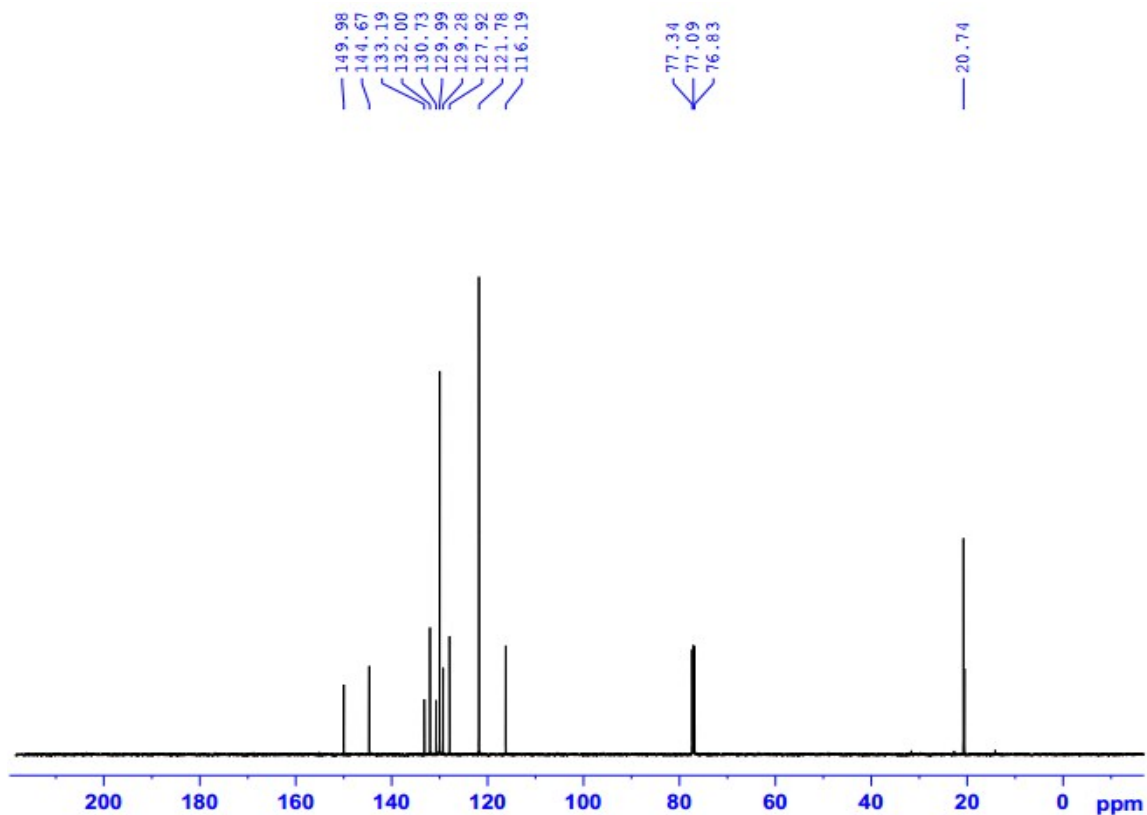

Fig. S22.  $^{13}\text{C}$ -NMR spectra of 2-(di-*p*-tolylamino)-4-methylphenol.

**Characterization data for 2-(di-*p*-tolylamino)-4-methylphenol.**

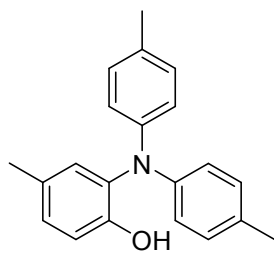

Prepared as shown in the general experimental procedure and purified on silica gel (ethyl acetate/hexan = 1:6): yellow iol, 88% yield.  $^1\text{H}$ -NMR (500 MHz,  $\text{CDCl}_3$ )  $\delta$  7.03 (d,  $J$ = 8 Hz, 4H), 6.94 – 6.86 (m, 7H), 5.34 (s, 1H), 2.28 (s, 3H), 2.19 (s, 3H);  $^{13}\text{C}$ -NMR (125 MHz,  $\text{CDCl}_3$ )  $\delta$  149.98, 144.67, 133.19, 132.00, 130.73, 129.99, 129.28, 127.92, 121.78, 116.19.

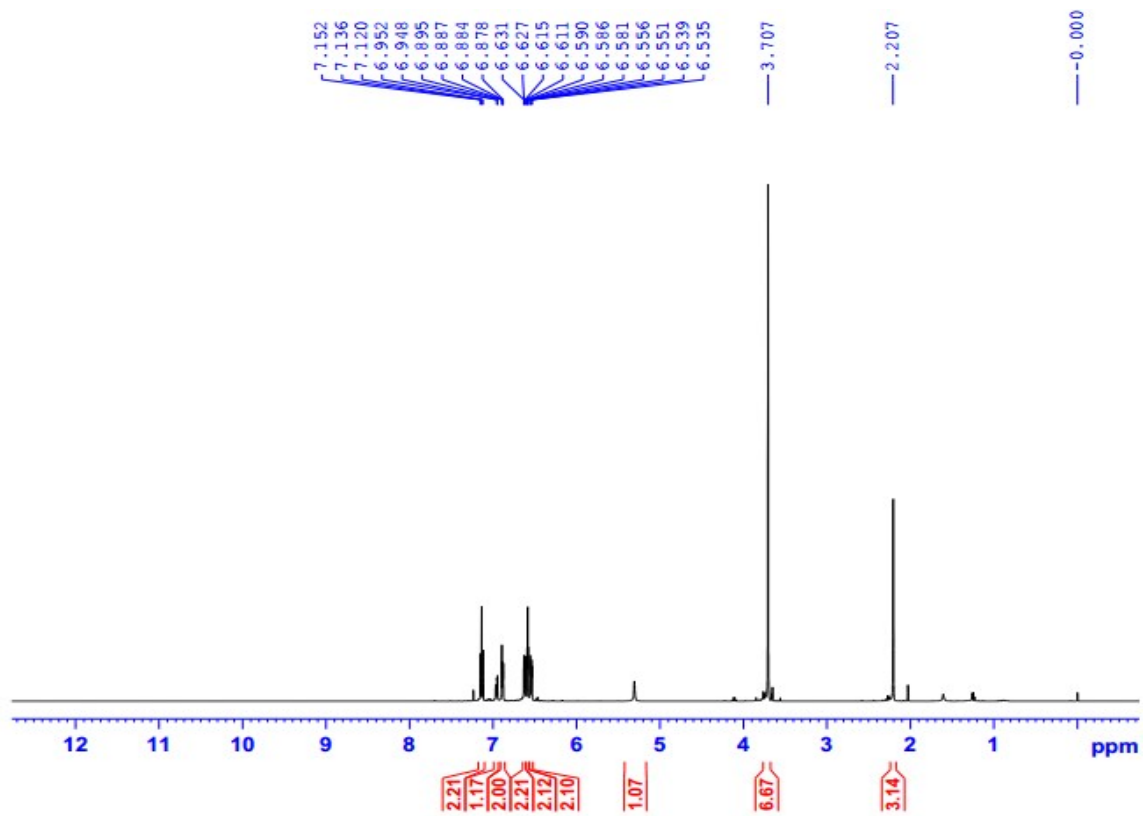

Fig. S23.  $^1\text{H-NMR}$  spectra of 2-(bis(3-methoxyphenyl)amino)-4-methylphenol.

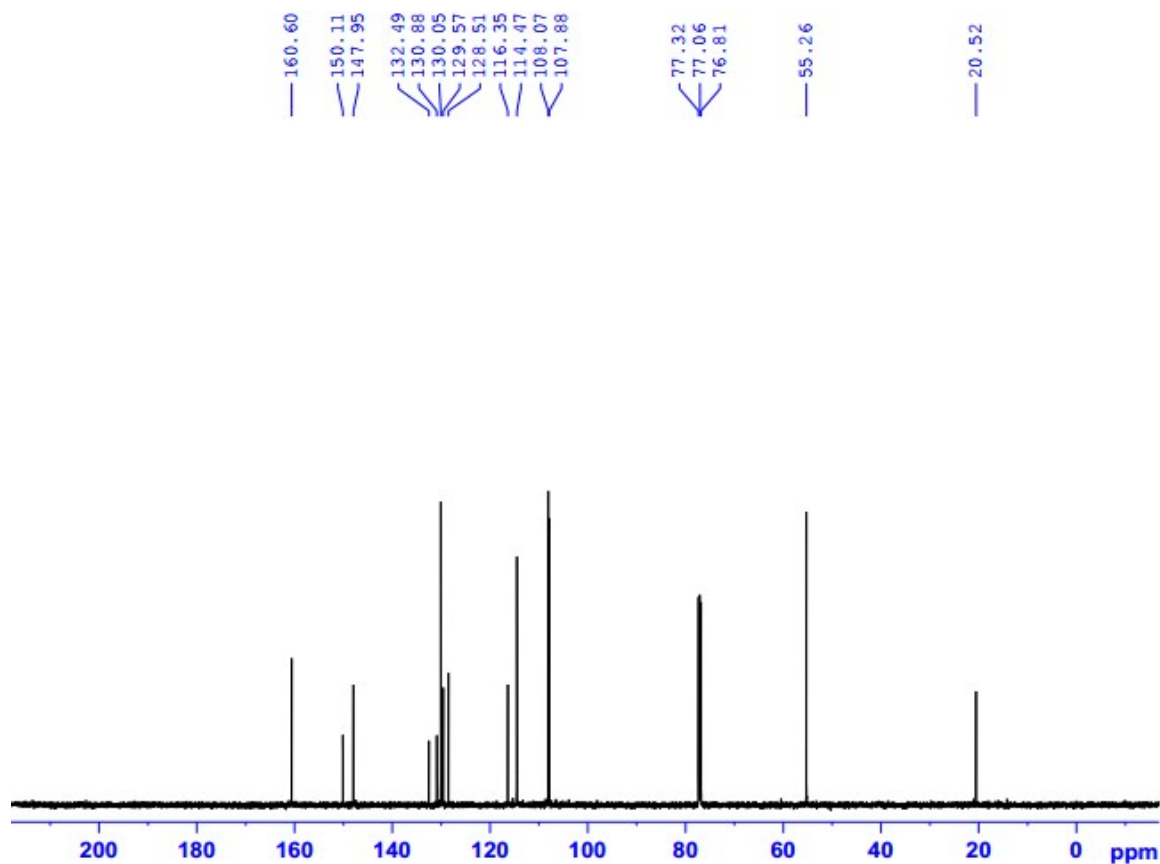

Fig. S24.  $^{13}\text{C}$ -NMR spectra of 2-(bis(3-methoxyphenyl)amino)-4-methylphenol.

**Characterization data for 2-(bis(3-methoxyphenyl)amino)-4-methylphenol.**

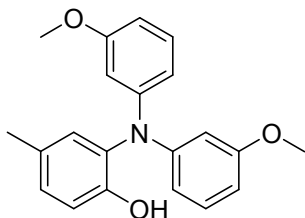

Prepared as shown in the general experimental procedure and purified on silica gel (ethyl acetate/hexan = 1:8): yellow iol, 72% yield.  $^1\text{H}$ -NMR (500 MHz,  $\text{CDCl}_3$ )  $\delta$  7.14 (t,  $J$ = 8 Hz, 2H), 6.97 - 6.95 (m, 1H), 6.89 - 6.88 (m, 2H), 6.63 - 6.53 (m, 6H), 5.30 (s, 1H), 3.71 (s, 6H), 2.21 (s, 3H);  $^{13}\text{C}$ -NMR (125 MHz,  $\text{CDCl}_3$ )  $\delta$  160.6, 150.11, 147.95, 132.49, 130.88, 130.05, 129.57, 128.51, 116.35, 114.47, 108.07, 107.88, 55.26.

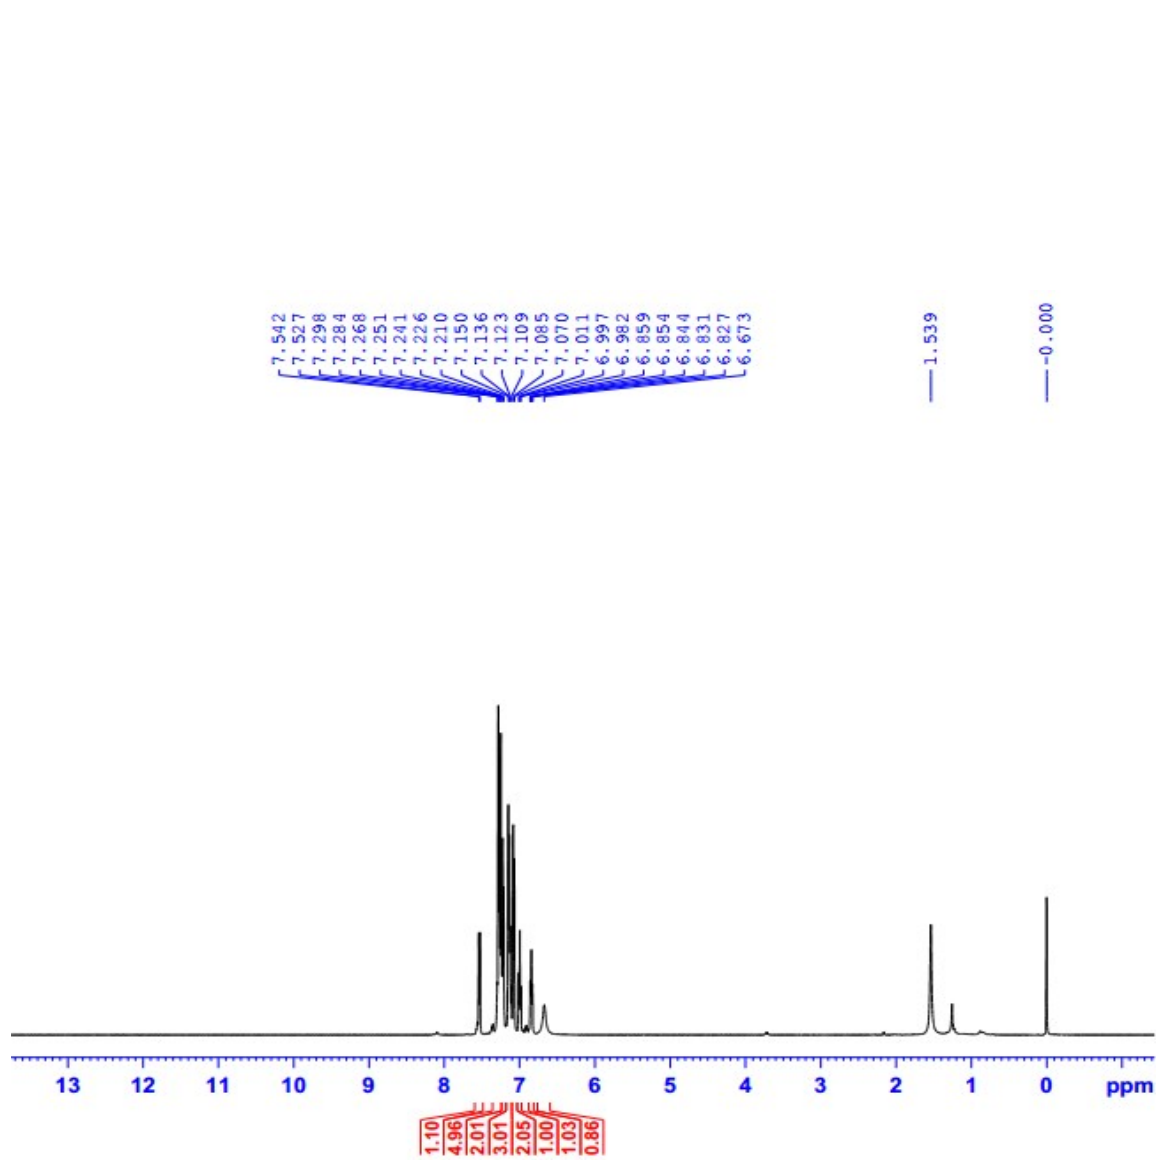

Fig. S25.  $^1\text{H}$ -NMR spectra of 2-(diphenylamino)benzenethiol.

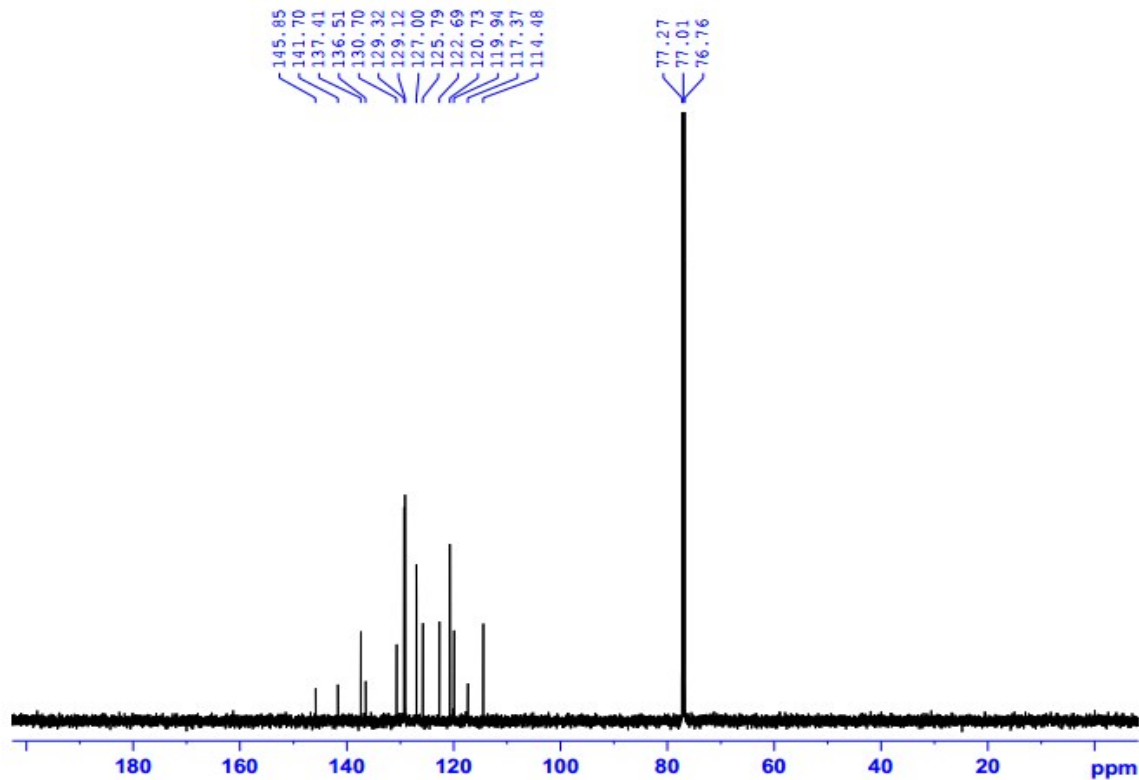

Fig. S26.  $^{13}\text{C}$ -NMR spectra of 2-(diphenylamino)benzenethiol.

**Characterization data for 2-(diphenylamino)benzenethiol.**

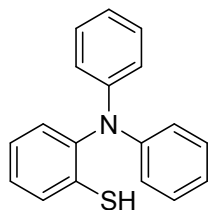

Prepared as shown in the general experimental procedure and purified on silica gel (ethyl acetate/hexan = 1:20): white solid, 79% yield.  $^1\text{H}$ -NMR (500 MHz,  $\text{CDCl}_3$ )  $\delta$  7.53 (d,  $J=7.5$  Hz, 1H), 7.29 - 7.21 (m, 6H), 7.15 - 7.07 (m, 5H), 7.00 (t,  $J=7$ Hz, 1H), 6.86 - 6.827 (m, 1H), 6.67 (s, 1H);  $^{13}\text{C}$ -NMR (125 MHz,  $\text{CDCl}_3$ )  $\delta$  145.85, 141.70, 137.41, 136.51, 130.70, 129.32, 129.12, 127.00, 125.79, 122.69, 120.73, 119.94, 117.37, 114.48.

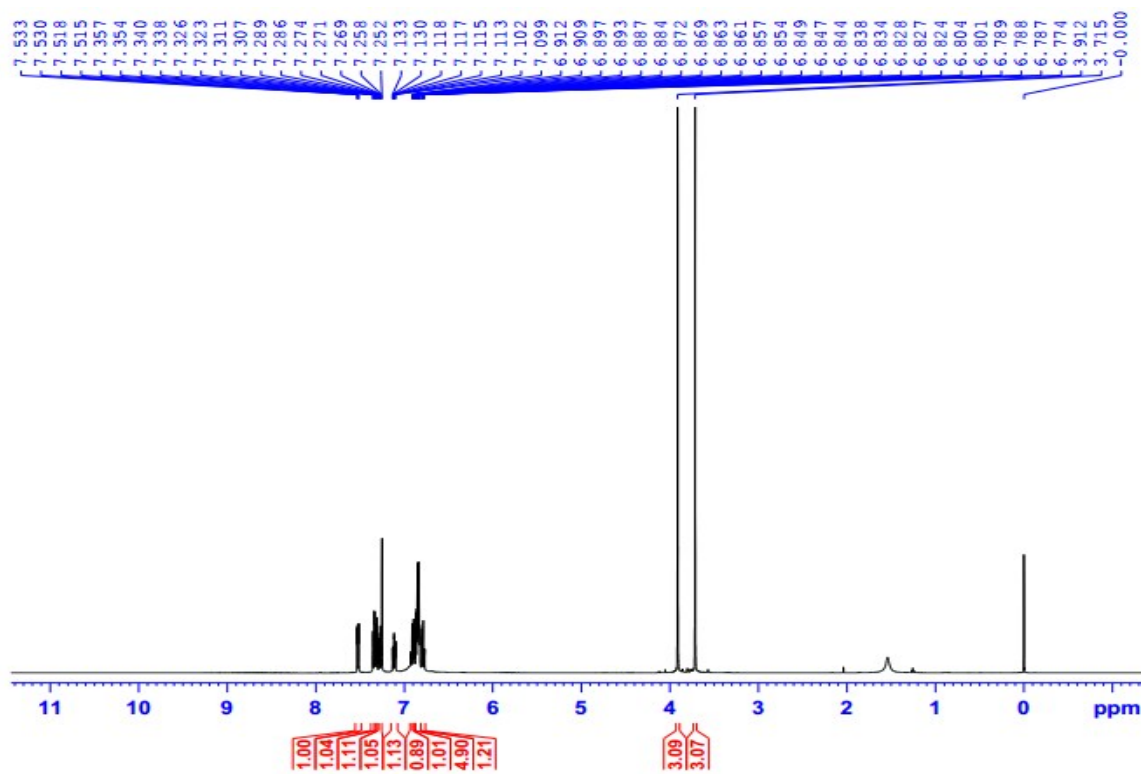

Fig. S27. <sup>1</sup>H-NMR spectra of 2-(bis(2-methoxyphenyl)amino)benzenethiol.

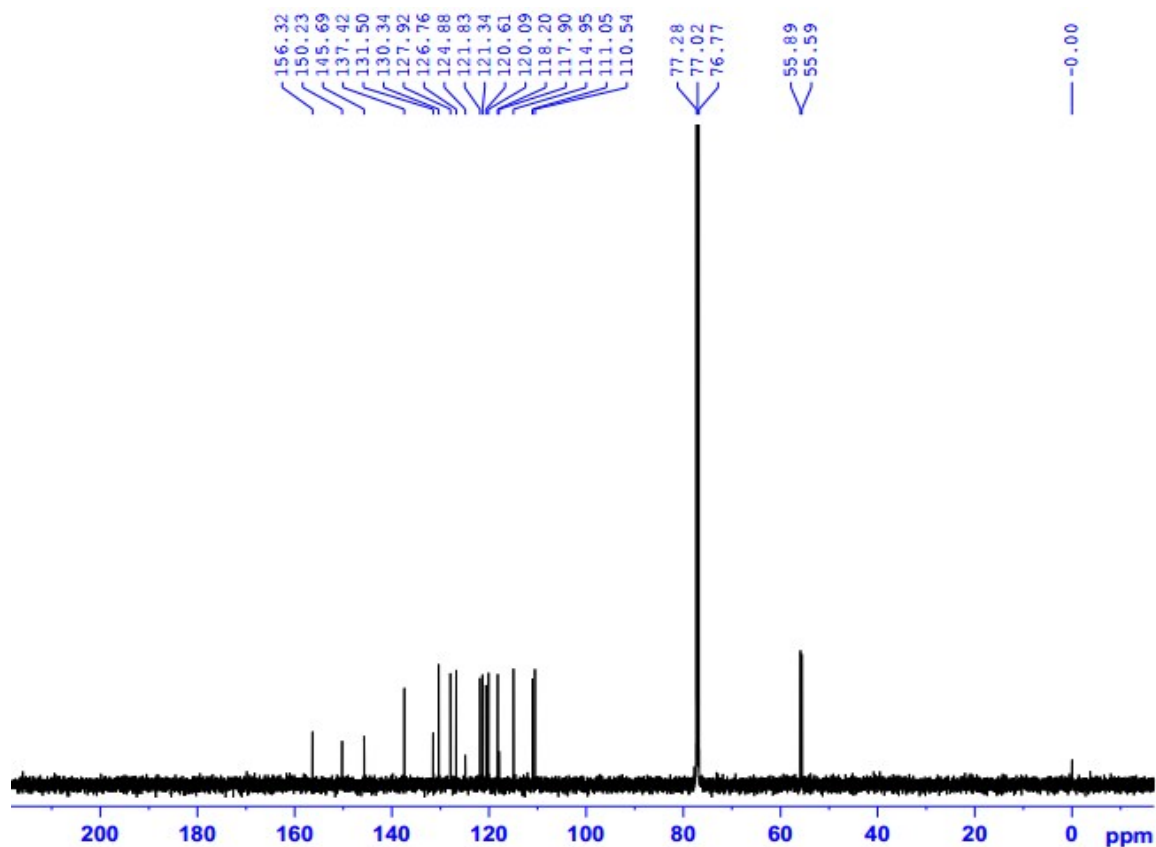

Fig. S28.  $^{13}\text{C}$ -NMR spectra of 2-(bis(2-methoxyphenyl)amino)benzenethiol.

**Characterization data for 2-(bis(2-methoxyphenyl)amino)benzenethiol.**

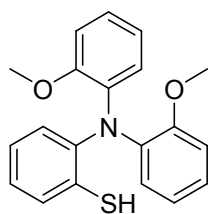

Prepared as shown in the general experimental procedure and purified on silica gel (ethyl acetate/hexan = 1:6): yellow oil, 85% yield.  $^1\text{H}$ -NMR (500 MHz,  $\text{CDCl}_3$ )  $\delta$  7.55 - 7.50 (dd,  $J=6\text{Hz}$ , 1H), 7.36 - 7.26 (m, 3H), 7.13- 7.099 (m, 1H), 6.93 - 6.78 (m, 8H), 3.91(s, 3H), 3.715(s, 3H);  $^{13}\text{C}$ -NMR (125 MHz,  $\text{CDCl}_3$ )  $\delta$  156.32, 150.23, 145.69, 137.42, 131.50, 130.34, 127.92,

126.76, 124.88, 121.83, 121.34, 120.61, 120.09, 118.20, 117.90, 114.95, 111.05, 110.54, 55.89, 55.59.

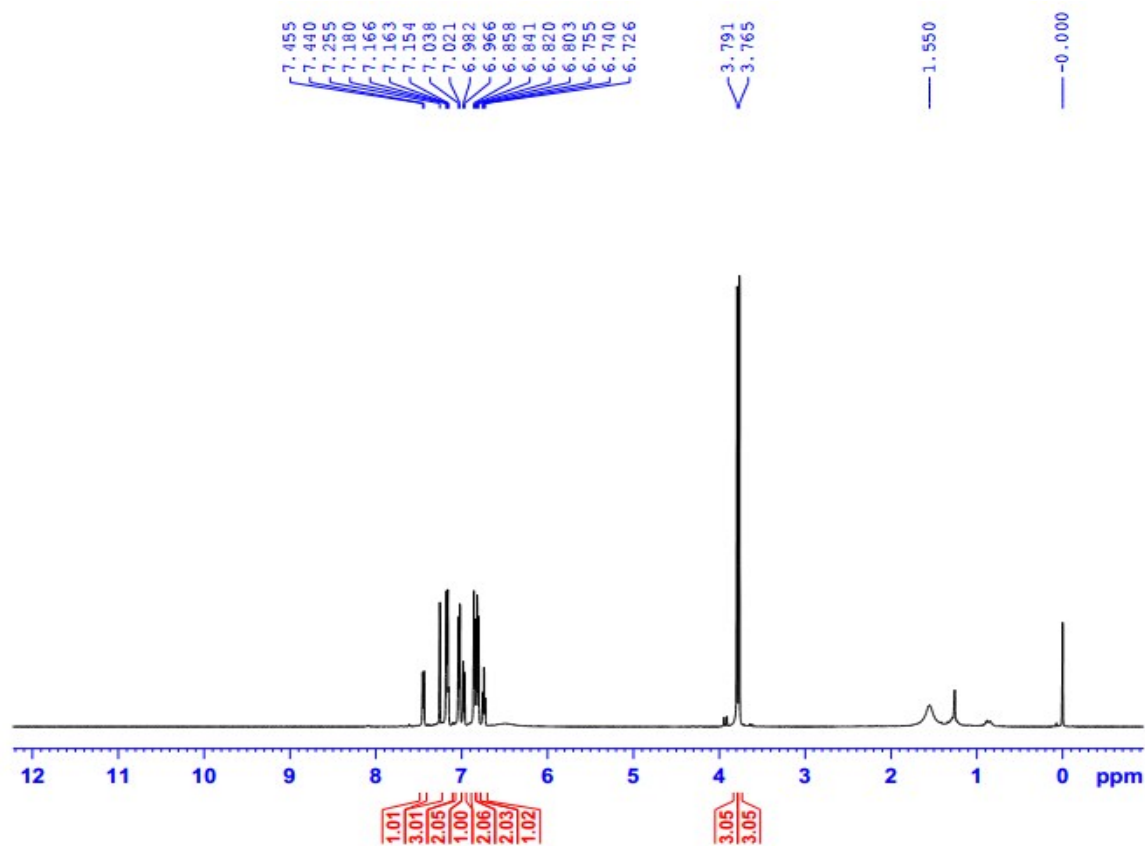

Fig. S29.  $^1\text{H}$ -NMR spectra of 2-(bis(4-methoxyphenyl)amino)benzenethiol.



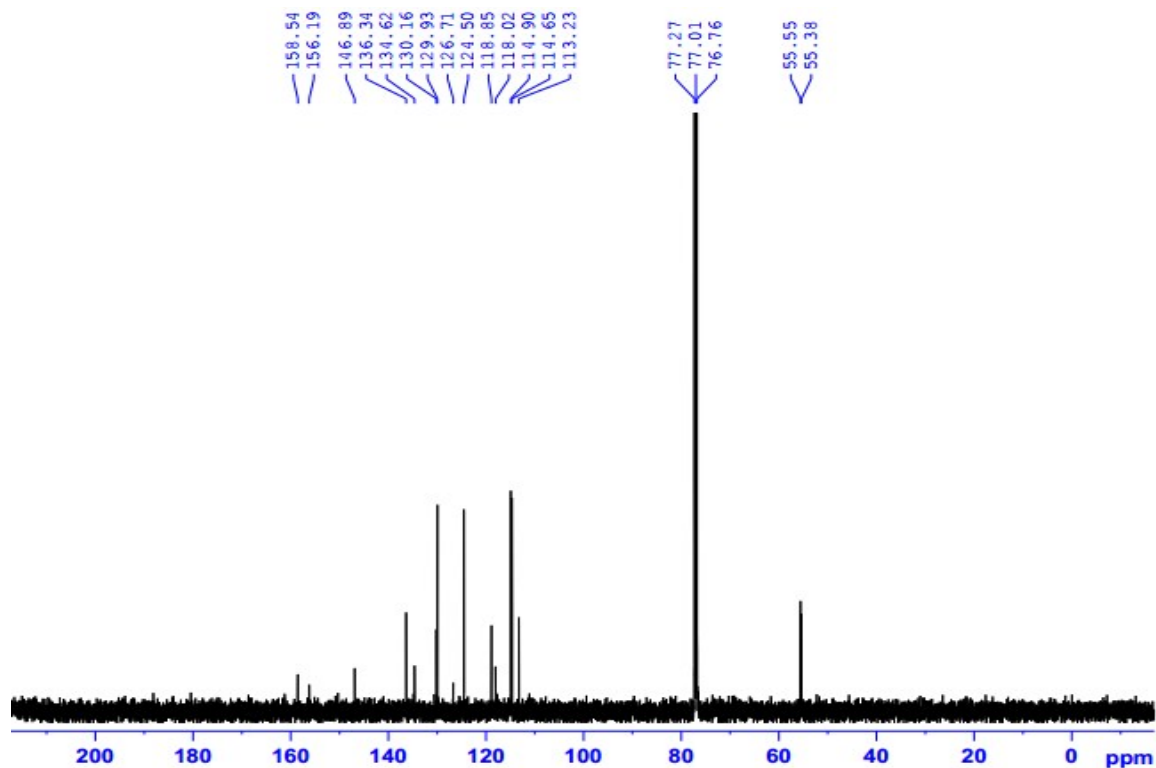

Fig. S30.  $^{13}\text{C}$ -NMR spectra of 2-(bis(4-methoxyphenyl)amino)benzenethiol.

**Characterization data for 2-(bis(4-methoxyphenyl)amino)benzenethiol.**

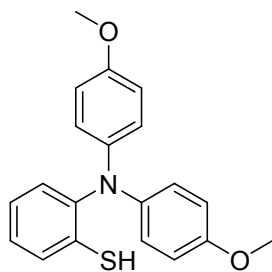

Prepared as shown in the general experimental procedure and purified on silica gel (ethyl acetate/hexan = 1:2): yellow oil, 84% yield.  $^1\text{H}$ -NMR (500 MHz,  $\text{CDCl}_3$ )  $\delta$  7.45 (d,  $J= 7.5$  Hz, 1H), 7.18 - 7.15 (m, 3H), 7.03 (d,  $J= 8.5$  Hz, 2H), 6.97 (d,  $J= 8\text{Hz}$ , 1H), 6.85 (d,  $J= 8.5$  Hz, 2H), 6.81 (d,  $J= 8.5$  Hz, 2H), 6.74 (t,  $J= 7.5$  Hz, 1H), 3.79 (s, 3H), 3.76 (s, 3H);  $^{13}\text{C}$ -NMR (125 MHz,  $\text{CDCl}_3$ )  $\delta$  158.54, 156.19, 146.89, 136.34, 134.62, 130.16, 129.93, 126.71, 124.50, 118.85, 118.02, 114.90, 114.65, 113.23, 55.55, 55.38.

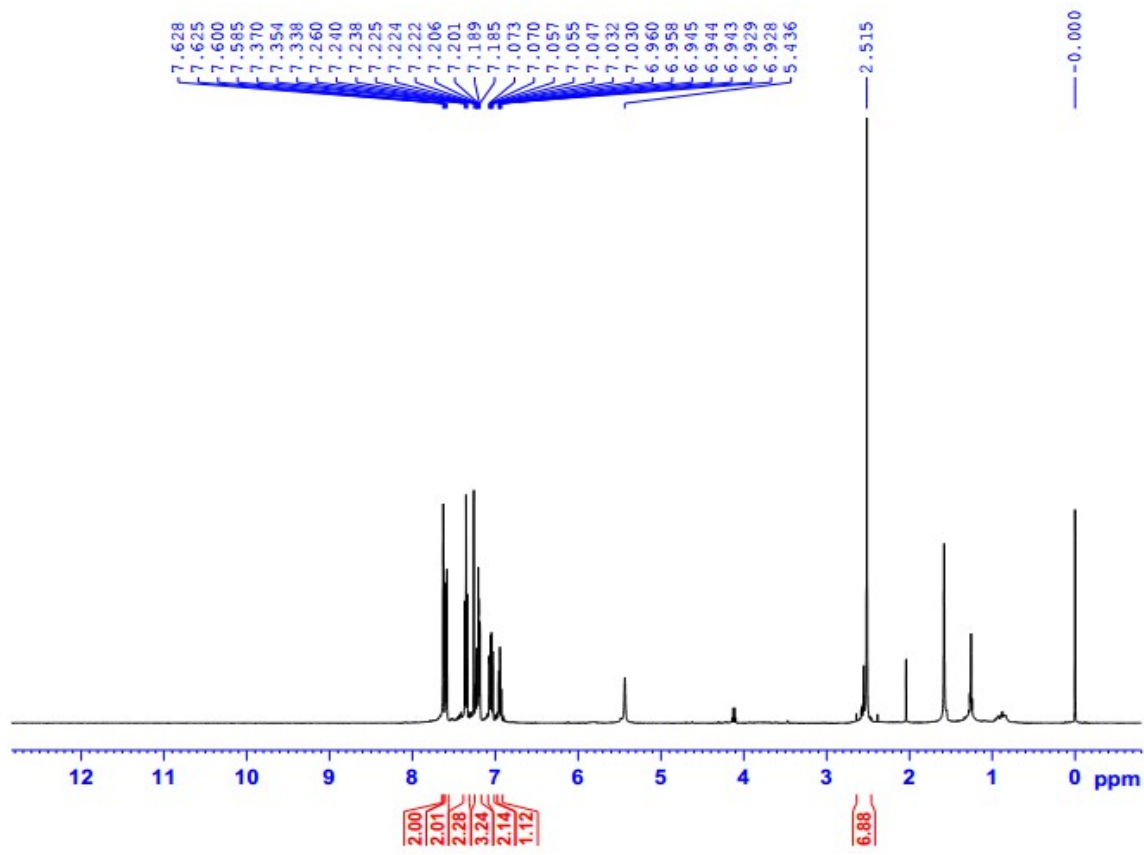

Fig. S31. <sup>1</sup>H-NMR spectra of 1,1'-(((2-hydroxyphenyl)azanediyl)bis(3,1-phenylene))diethanone.

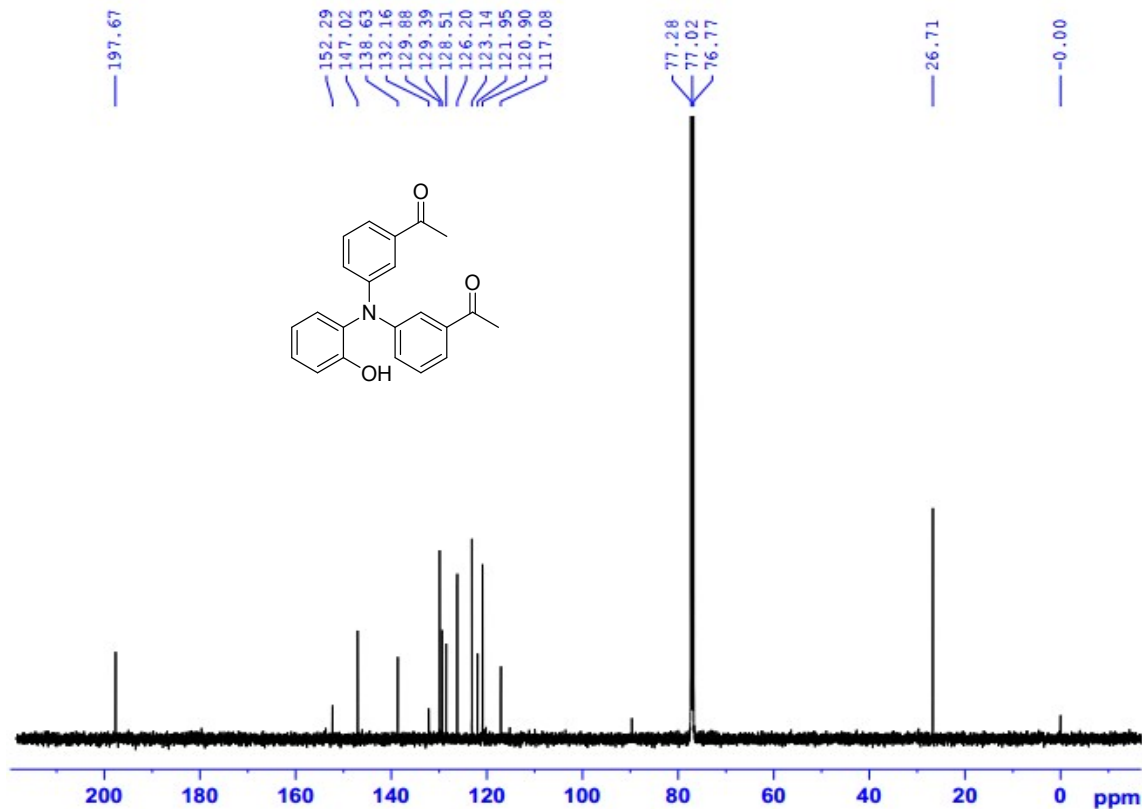

Fig. S32. <sup>13</sup>C-NMR spectra of 1,1'-(((2-hydroxyphenyl)azanediyl)bis(3,1-phenylene))diethanone.

**Characterization data for 1,1'-(((2-hydroxyphenyl)azanediyl)bis(3,1-phenylene))diethanone.**

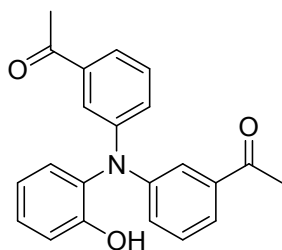

Prepared as shown in the general experimental procedure and purified on silica gel (ethyl acetate/hexan = 1:3): light orange solid, 58% yield. <sup>1</sup>H NMR (500 MHz, CDCl<sub>3</sub>) δ 7.63-7.58 (m, 4H), 7.35 (t, *J* = 8 Hz, 2H), 7.24-7.18 (m, 3H), 7.07-7.03 (m, 2H), 6.96-6.93 (m, 1H), 5.44 (s, 1H), 2.52 (s, 6H); <sup>13</sup>C NMR (125 MHz, CDCl<sub>3</sub>) δ 197.67, 152.29, 147.02, 138.63, 132.16, 129.88, 129.39, 128.51, 126.20, 123.14, 121.95, 120.90, 117.08, 26.71.

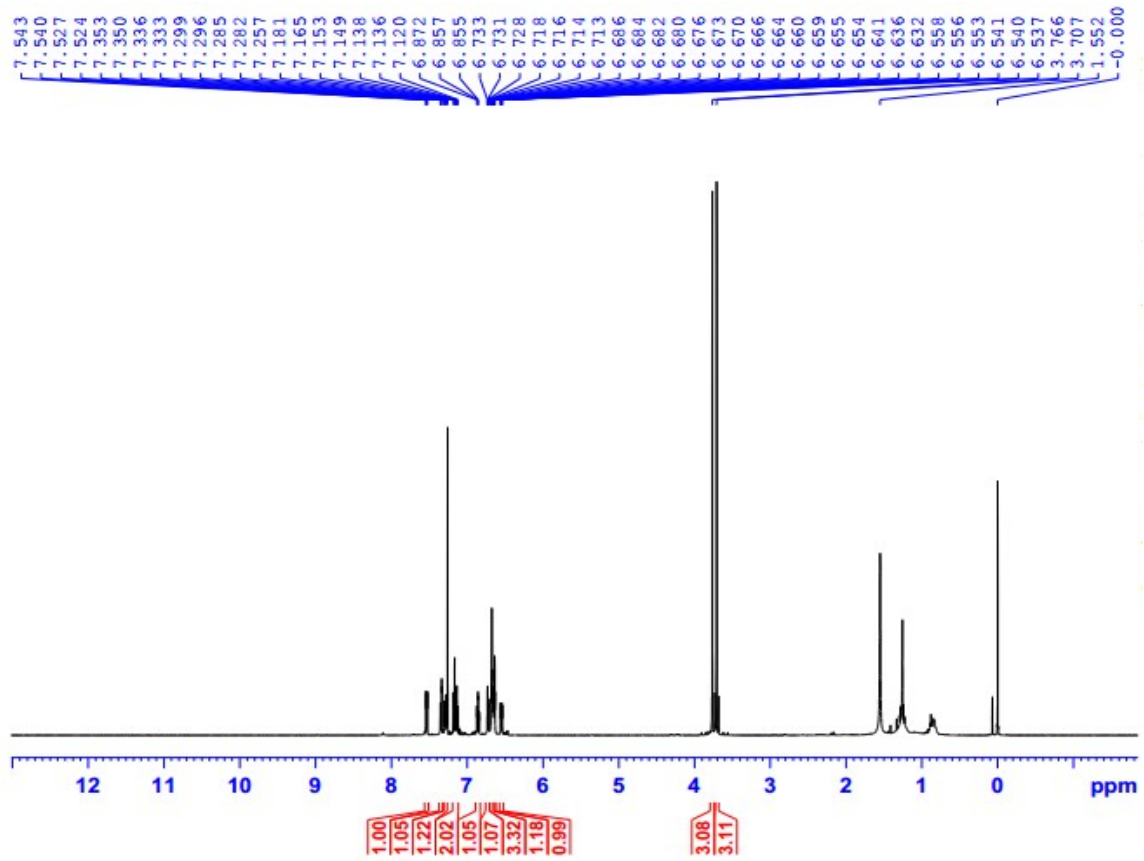

Fig. S33. <sup>1</sup>H-NMR spectra of 2-(bis(3-methoxyphenyl)amino)benzenethiol.

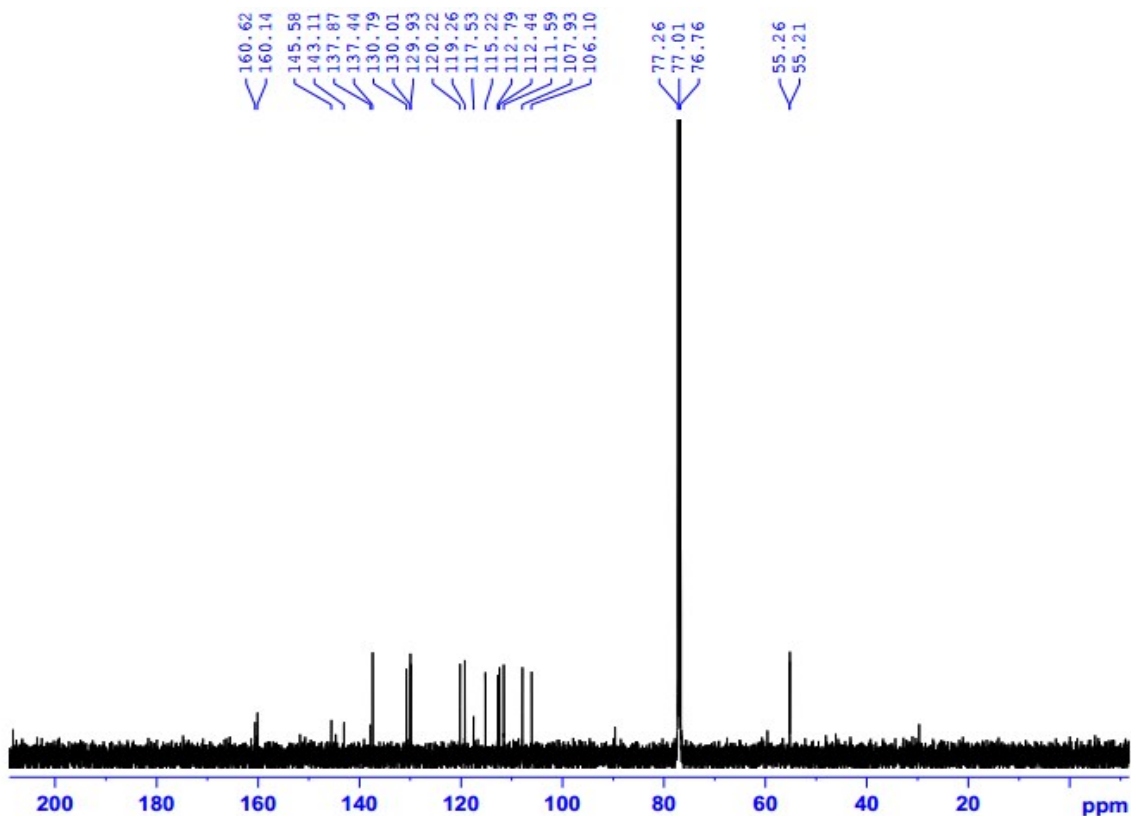

Fig. S34.  $^{13}\text{C}$ -NMR spectra of 2-(bis(3-methoxyphenyl)amino)benzenethiol.

**Characterization data for 2-(bis(3-methoxyphenyl)amino)benzenethiol.**

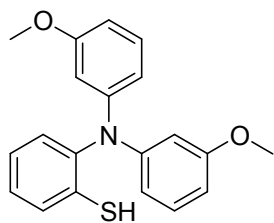

Prepared as shown in the general experimental procedure and purified on silica gel (ethyl acetate/hexan = 1:6): yellow oil, 68% yield.  $^1\text{H}$ -NMR (500 MHz,  $\text{CDCl}_3$ )  $\delta$  7.54 - 7.52 (dd,  $J=6.5\text{Hz}$ , 1H), 7.35 - 7.33 (dd,  $J=7\text{Hz}$ , 1H), 7.30 - 7.26 (m, 1H), 7.18 - 7.12 (m, 2H), 6.87 - 6.84 (m, 1H), 6.73 - 6.63 (m, 5H), 6.56 - 6.53 (m, 1H), 3.76 (s, 3H), 3.71 (s, 3H);  $^{13}\text{C}$ -NMR (125

MHz, CDCl<sub>3</sub>) δ 160.62, 160.14, 145.58, 143.11, 137.87, 137.44, 130.79, 130.01, 129.93, 120.22, 119.26, 117.53, 115.22, 112.79, 112.44, 111.59, 107.93, 106.10, 55.26, 55.21.

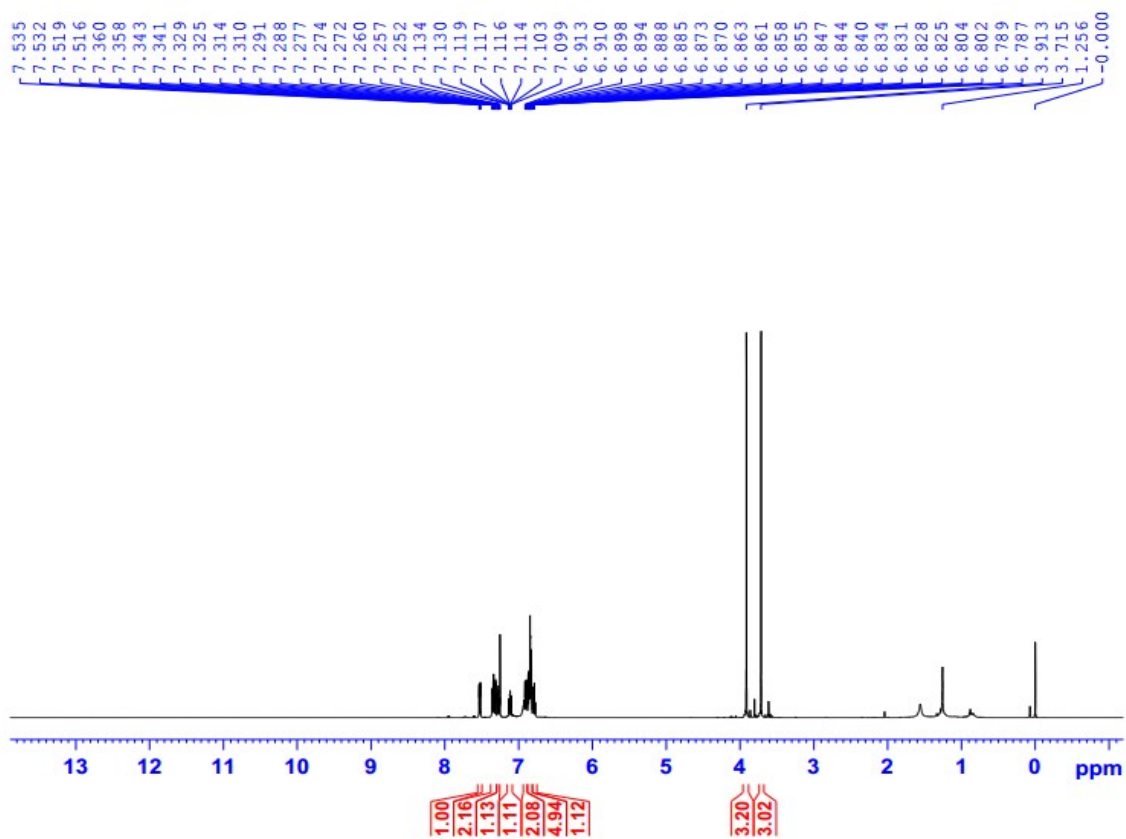

Fig. S35. <sup>1</sup>H-NMR spectra of 2-(bis(2-methoxyphenyl)amino)benzenethiol.

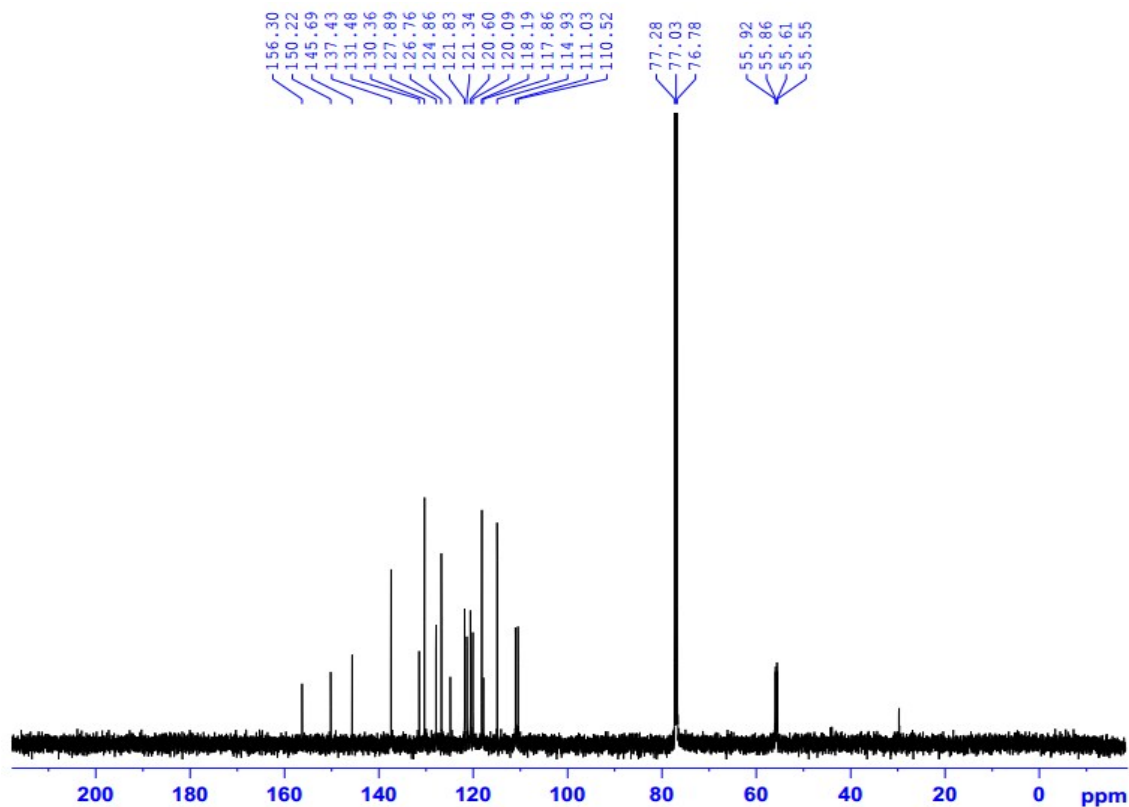

Fig. S36.  $^{13}\text{C}$ -NMR spectra of 2-(bis(2-methoxyphenyl)amino)benzenethiol.

**Characterization data for 2-(bis(2-methoxyphenyl)amino)benzenethiol.**

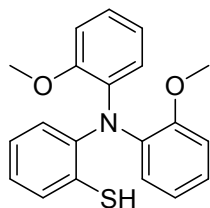

Prepared as shown in the general experimental procedure and purified on silica gel (ethyl acetate/hexan = 1:6): yellow oil, 77% yield.  $^1\text{H}$ -NMR (500 MHz,  $\text{CDCl}_3$ )  $\delta$  7.54 - 7.52 (dd,  $J=$  8Hz, 1H), 7.36 - 7.26 (m, 3H), 7.13- 7.099 (m, 1H), 6.93 - 6.77 (m, 8H), 3.91(s, 3H), 3.715(s, 3H);  $^{13}\text{C}$ -NMR (125 MHz,  $\text{CDCl}_3$ )  $\delta$  156.30, 150.22, 145.69, 137.43, 131.48, 130.36, 127.89,

126.76, 124.86, 121.83, 121.34, 120.60, 120.09, 118.19, 117.86, 114.93, 111.03, 110.52, 55.89, 55.59.

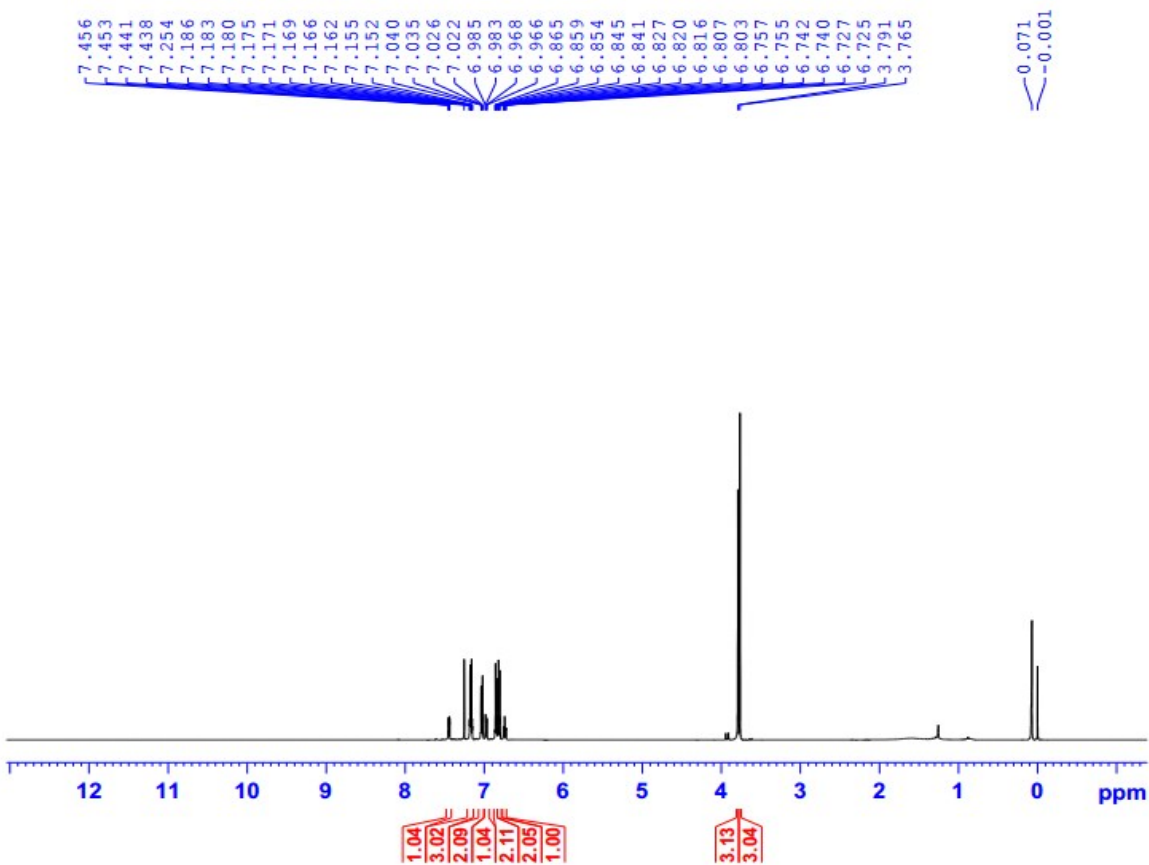

Fig. S37. <sup>1</sup>H-NMR spectra of 2-(bis(4-methoxyphenyl)amino)benzenethiol.



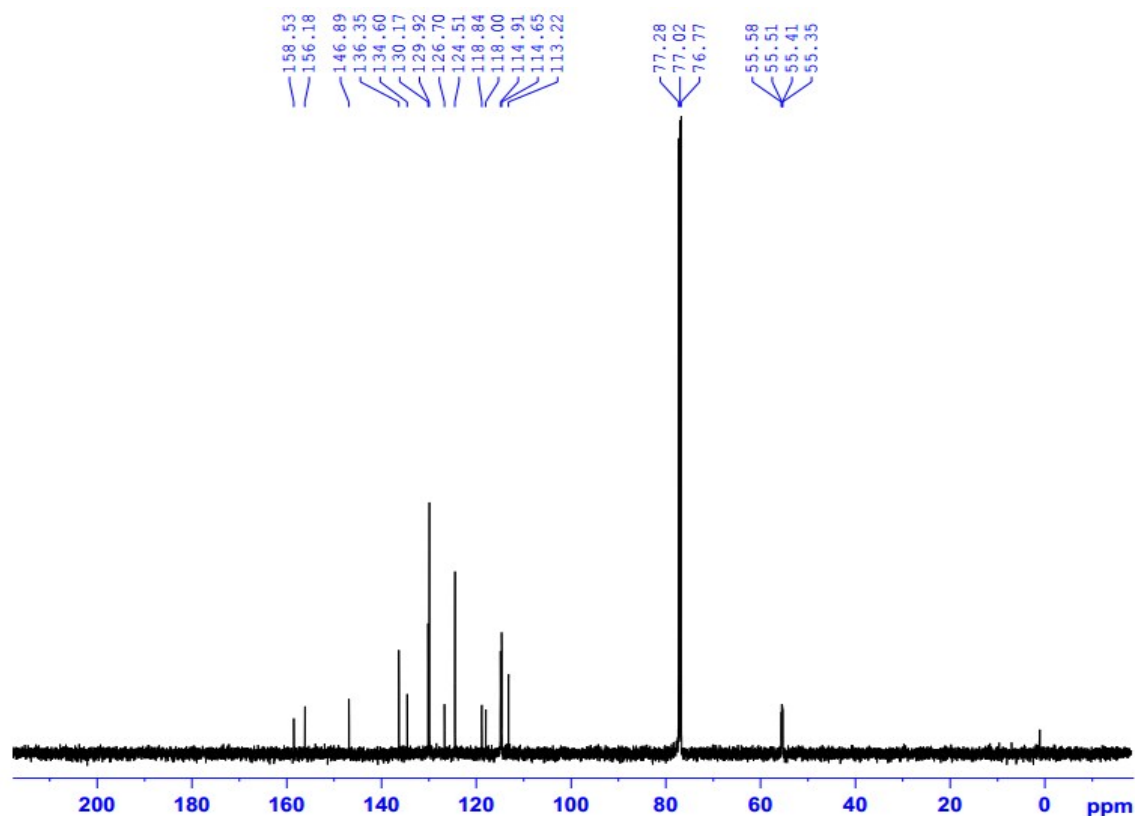

Fig. S38.  $^{13}\text{C}$ -NMR spectra of 2-(bis(4-methoxyphenyl)amino)benzenethiol.

**Characterization data for 2-(bis(4-methoxyphenyl)amino)benzenethiol.**

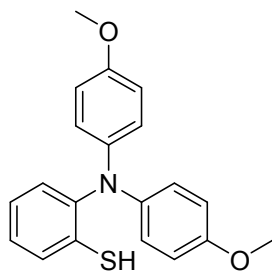

Prepared as shown in the general experimental procedure and purified on silica gel (ethyl acetate/hexan = 1:2): yellow oil, 61% yield.  $^1\text{H}$ -NMR (500 MHz,  $\text{CDCl}_3$ )  $\delta$  7.456 - 7.438 (dd,  $J$  = 7.5 Hz, 1H), 7.18 - 7.15 (m, 3H), 7.04 - 7.02 (dd,  $J$  = 7 Hz, 2H), 6.86- 6.72 (dd,  $J$  = 8.5Hz, 1H), 6.86 - 6.80 (m, 4H), 6.757 - 6.742 (ddd,  $J$  = 7.5Hz, 1H), 3.79 (s, 3H), 3.76 (s, 3H);  $^{13}\text{C}$ -

NMR (125 MHz, CDCl<sub>3</sub>)  $\delta$  158.53, 156.18, 146.89, 136.35, 134.60, 130.17, 129.92, 126.70, 124.51, 118.84, 118.00, 114.91, 114.65, 113.22, 55.55, 55.38.
